# Supplementary material for: Psychometric evaluation of the Chinese version of the Person-centred Climate Questionnaire - Staff version (PCQ-S)
Source: PubMed Central journal article supplement (PMC5724089; doi:10.1136/bmjopen-2017-017250), 2017-08-28
Supplement: bmjopen-2017-017250.draft_revisions.pdf [file bmjopen-2017-017250.draft_revisions.pdf]

# BMJ Open

BMJ Open is committed to open peer review. As part of this commitment we make the peer review history of every article we publish publicly available.

When an article is published we post the peer reviewers' comments and the authors' responses online. We also post the versions of the paper that were used during peer review. These are the versions that the peer review comments apply to.

The versions of the paper that follow are the versions that were submitted during the peer review process. They are not the versions of record or the final published versions. They should not be cited or distributed as the published version of this manuscript.

BMJ Open is an open access journal and the full, final, typeset and author-corrected version of record of the manuscript is available on our site with no access controls, subscription charges or pay-per-view fees (<http://bmjopen.bmj.com>).

If you have any questions on BMJ Open's open peer review process please email [info.bmjopen@bmj.com](mailto:info.bmjopen@bmj.com)

# BMJ Open

## Psychometric evaluation of the Chinese version Person-centred Climate Questionnaire - staff

|                                 |                                                                                                                                                                                                                                                                                                                                                                                                                                                    |
|---------------------------------|----------------------------------------------------------------------------------------------------------------------------------------------------------------------------------------------------------------------------------------------------------------------------------------------------------------------------------------------------------------------------------------------------------------------------------------------------|
| Journal:                        | <i>BMJ Open</i>                                                                                                                                                                                                                                                                                                                                                                                                                                    |
| Manuscript ID                   | bmjopen-2017-017250                                                                                                                                                                                                                                                                                                                                                                                                                                |
| Article Type:                   | Research                                                                                                                                                                                                                                                                                                                                                                                                                                           |
| Date Submitted by the Author:   | 12-Apr-2017                                                                                                                                                                                                                                                                                                                                                                                                                                        |
| Complete List of Authors:       | Cai, Le; School of Public Health<br>Ahlström, Gerd; Lunds Universitet<br>Tang, Pingfen; Kunming Medical University<br>Ma, Ke; The third people's hospital of Kunming<br>Edvardsson, David; La Trobe University School of Nursing and Midwifery<br>Behm, Lina; Lunds Universitet<br>Fu, Haiyan; the third people's hospital of Kunming<br>Zhang, Jie; the third people's hospital of Kunming<br>Yang, Jiqun; the third people's hospital of Kunming |
| <b>Primary Subject Heading</b>: | Nursing                                                                                                                                                                                                                                                                                                                                                                                                                                            |
| Secondary Subject Heading:      | Geriatric medicine, Nursing                                                                                                                                                                                                                                                                                                                                                                                                                        |
| Keywords:                       | GERIATRIC MEDICINE, Quality in health care < HEALTH SERVICES ADMINISTRATION & MANAGEMENT, PALLIATIVE CARE                                                                                                                                                                                                                                                                                                                                          |
|                                 |                                                                                                                                                                                                                                                                                                                                                                                                                                                    |

SCHOLARONE™  
Manuscripts

Only

# Psychometric evaluation of the Chinese version Person-centred Climate Questionnaire - staff

Cai Le <sup>1</sup>, Gerd Ahlström <sup>2</sup>, Tang Pingfen <sup>1</sup>, Ma Ke <sup>3</sup>, David Edvardsson <sup>4</sup>, Lina Behm <sup>2</sup>, Fu Haiyan <sup>3</sup>, Zhang Jie <sup>3</sup> and Yang Jiqun <sup>3</sup>

Address: <sup>1</sup> 1168 Yu Hua Street Chun Rong Road, Cheng Gong New City, School of Public Health, Kunming Medical University, Kunming 650500, China;

<sup>2</sup> Department of Health Sciences, Faculty of Medicine, Lund University, Sweden;

<sup>3</sup> Division of palliative care, the third people's hospital of Kunming, China;

<sup>4</sup> Austin Health/Northern Health Clinical Schools of Nursing College of Science, Health and Engineering, La Trobe University, Australia

Email address:

Cai Le \* : [1018606825@qq.com](mailto:1018606825@qq.com);

Gerd Ahlström: [gerd.ahlstrom@med.lu.se](mailto:gerd.ahlstrom@med.lu.se);

Tang Pingfen: [yangyi57@vip.126.com](mailto:yangyi57@vip.126.com);

Ma Ke: [kmmake@126.com](mailto:kmmake@126.com);

David Edvardsson: [D.Edvardsson@latrobe.edu.au](mailto:D.Edvardsson@latrobe.edu.au);

Lina Behm: [Lina.behm@med.lu.se](mailto:Lina.behm@med.lu.se);

Fu Haiyan: [fuhaiyan0622@163.com](mailto:fuhaiyan0622@163.com);

Zhang Jie: [13888437137@126.com](mailto:13888437137@126.com);

Yang Jiqun: [1181780508@qq.com](mailto:1181780508@qq.com)

\* Corresponding author

# Abstract

## Objectives

The aim of the study was to conduct a cross-cultural adaptation of the English version Person-centred Climate Questionnaire – staff version (PCQ-S) for Chinese health care staff and to evaluate the psychometric properties of the translated Chinese version in a hospital context.

## Design

This was a cross-sectional design. The 14-item English PCQ-S was translated and back translated using established procedures. Construct validity and reliability including internal consistency and test-retest reliability were assessed among hospital staffs. Construct validity was tested using Principal component analysis (PCA). Internal consistency was tested using Cronbach's alpha. Test-retest reliability was evaluated through the Pearson correlation coefficient (r) and intra-class correlation coefficient (ICC).

## Setting

This study was conducted in three hospitals in Kunming, the capital of the Yunnan province in south-west China.

## Participants

A sample of hospital staff (n=163) on duty at the departments of palliative care in three hospitals of Kunming consented to participate in the study.

## Results

The results confirmed that the 14-item Chinese PCQ-S consisted of the three subscales shown in other language versions. It showed strong internal consistency through a Cronbach's alpha of 0.94 for the total scale, 0.87 for the safety subscale, 0.90 for the everydayness subscale and 0.88 for the community subscale. The Chinese PCQ-S had high test-retest reliability as evidenced by a high correlation coefficient on all scale levels between test and retest scores, on 'a climate of safety' (r = 0.88, P<0.01), 'a climate of everydayness' (r=0.91, P<0.01), 'a climate of community' (r=0.79, P<0.01) and on overall scale scores (r=0.93, P<0.01). The ICC to evaluate

1  
2  
3 the test-retest reliability was 0.93 (95% CI: 0.91- 0.95).  
4

### 5 **Conclusions**

6  
7 The Chinese version of PCQ-S is a seemingly valid and reliable tool, which showed  
8  
9 satisfactory reliability and validity for assessing staff perceptions of the  
10  
11 person-centredness climate in Chinese hospital environments.  
12

13  
14  
15 **Keywords:** Person-centred care; hospitals; nursing; questionnaire; scale development;  
16  
17 China  
18

### 19 **Article summary**

20  
21  
22 Strengths and limitations of this study  
23

- 24 ● The first study to validate the PCQ-S in an Asian population.
  - 25 ● High response rate (90%) in this study.
  - 26 ● Convenience sampling method may limit the ability to generalize the results.
  - 27 ● The Chinese PCQ-S has been tested only in this hospital environment.
- 28  
29  
30  
31  
32  
33  
34  
35  
36  
37  
38  
39  
40  
41  
42  
43  
44  
45  
46  
47  
48  
49  
50  
51  
52  
53  
54  
55  
56  
57  
58  
59  
60

## Introduction

Population aging is a global phenomenon and has become a significant public health problem worldwide. Along with the high-speed economic growth and demographic change in the last two decades, China is becoming one of the most rapidly ageing countries in the world. The proportion of older people aged 60 years or more was 13.3 % in 2010 [1], and is projected to reach 32.8 % by 2050 [2]. Studies have indicated that older people are more likely to suffer from various diseases, and more particularly chronic disease and comorbidity, which is more difficult to cure due to complexity and coexistence [3]. Chronic diseases may result in disability in older people; therefore, the rising number of older people increases the demand for hospitalization and special care and supports from multiple care professionals and providers [4]. This presenting a key challenge for Chinese healthcare systems to provide high quality care for this group.

In recent decades, person-centred care (PCC) has become recognized as a quality focus of elderly care services, which emphasizes the individual's perspective and active participation in the care process [5]. PCC as a concept implies in various ways assisting an individual to be able to be a "whole" human being, by encouraging them to participate in decisions and adjusting the physical environment and the content of the care to fit the needs of each individual. It is defined as 'valuing people as individuals' in delivering health care [6] and are based on people's subjective experience of illness instead of the disease [7-9]. The care process becomes the foundation for how PCC should be provided and the relationship between the professional caregiver and the care recipient becomes essential [10-12]. Person-centredness is now regarded as a central feature of high quality long-term care for older persons. As such PCC must be a part of the care organisation priorities, and the system need to support and sustain this change through policy and procedures, job descriptions, and education [13]. PCC improves autonomy in elderly care through its focus on individual care plans and support for next of kin who are seen as important resources [14]. There is evidence to indicate that the person-centredness of a setting is

1  
2  
3 associated with staff's satisfaction with work [15], and staff perceptions of and  
4 relationships with patients are crucially important to quality care. Also, for the older  
5 person, a person-centered setting have shown to increased wellbeing and decreased  
6 discomfort [16, 17].  
7  
8  
9

10  
11  
12 Edvardsson and colleagues have developed a Swedish language Person-centred  
13 Climate Questionnaire – staff version (PCQ-S) for evaluating to what extent the  
14 climate of care environments are experienced as being person-centred by staff [18].  
15 This instrument has been translated from Swedish into Norwegian [19] and English  
16 [20]. The original, as well as the translated Norwegian and English scales have been  
17 demonstrated to be valid and reliable tools for assessing staff perceptions of  
18 person-centredness. However, there exists no Chinese version of the PCQ-S so far,  
19 which presents a barrier for measuring and developing of person-centered care and for  
20 conducting further studies in China with possibilities to make international  
21 comparisons. Therefore, the purpose of this study was to conduct a cross-cultural  
22 adaptation of the English version of PCQ-S for Chinese health care staff and to  
23 evaluate the psychometric properties of the translated Chinese version in a hospital  
24 context.  
25  
26  
27  
28  
29  
30  
31  
32  
33  
34  
35  
36  
37  
38

## 39 **Methods**

### 40 **Instrument**

41  
42 The English PCQ-S questionnaire consists of 14 items and has three subscales (a  
43 climate of safety, everydayness, and community) [19]. A climate of safety is  
44 measured through items 1-5, everydayness is measured through items 6-10, and  
45 community is measured through items 11-14. Scoring is performed on a 6-point  
46 Likert-type scale, ranging from 0 (No, I disagree completely) to 5 (Yes, I agree  
47 completely). Aggregated scores are calculated using simple sum scores at subscale  
48 and total scale levels, which range from 0 to 70, with higher scores indicating a  
49 setting perceived as being more person-centred. The English PCQ-S has previously  
50 been used and tested in hospital settings, and demonstrated to be a valid and reliable  
51  
52  
53  
54  
55  
56  
57  
58  
59  
60

1  
2  
3 tool for assessing staff perceptions of the unit person-centredness [20].  
4  
5  
6

### 7 **Translation and cross-cultural adaptation of the PCQ-S**

8  
9 The translation and cross-cultural adaptation was carried out according to previously  
10 published international test commission guidelines [21, 22]. First, forward translation  
11 from English to Chinese was performed independently by three native Chinese, two  
12 of them were university graduates with Public Health background and the last person  
13 was a physician familiar with palliative care. A consensus version was obtained after  
14 a discussion between the three translators. Second, the consensus version was back  
15 translated into English by two bilingual translators blinded to the procedures of the  
16 forward translation. Finally, a thorough comparison of the original, translated and  
17 back-translated versions was conducted by an expert committee, which consisted of  
18 all translators, three palliative care physicians and two university professors.  
19 Discrepancies in translations was discussed and resolved, a few wordings were  
20 adapted to the Chinese cultural setting, and a consensus pre-final version was reached.  
21 A final Chinese version was generated after pre-testing through face-validity the  
22 pre-final version on 10 staff from a municipal hospital of Kunming, no any changes  
23 was made after the pre-testing.  
24  
25  
26  
27  
28  
29  
30  
31  
32  
33  
34  
35  
36  
37  
38

### 39 **Sample and participants**

40 Three municipal hospitals of Kunming, the capital of Yunnan province in south-west  
41 China, were selected through a convenience sampling method. Their participation was  
42 granted by the hospital directors. All staff (n=182) on duty at the departments of  
43 palliative care in these three hospitals were considered eligible for participation, and  
44 invited to complete the Chinese PCQ-S questionnaire. The eligible staff received oral  
45 information about the study and 163 consented to participate, representing an overall  
46 response rate of 90%. The participants completed questionnaires for both the test and  
47 retest assessments.  
48  
49  
50  
51  
52  
53  
54  
55  
56  
57

### 58 **Data collection**



1  
2  
3 Demographic data was collected along with the questionnaire survey including staff  
4 age, gender, level of education and duration of work experience. Two university  
5 graduates distributed questionnaires to all staff, and completed questionnaires were  
6 anonymously collected on site. To examine the test-retest reliability, all participants  
7 were asked to complete the same PCQ-S questionnaire 1 week later. Data were  
8 collected during October and November in 2016.  
9  
10  
11  
12  
13

### 14 15 16 **Psychometric evaluation**

17 No variable had missing values. All complete data were included in the analysis.  
18 Construct validity was estimated using principal component analysis (PCA) with  
19 varimax orthogonal rotation. Bartlett's test of sphericity was used to assess whether  
20 the correlation between items was adequate based on a criterion of  $p < 0.0001$ . The  
21 Kaiser-Meyer-Olkin (KMO) statistic was used to measure sample adequacy based on  
22 a criterion of  $\geq 0.7$ . Principal components were extracted when Kaiser's criterion of  
23 eigenvalues was  $\geq 1$ . A component loading cut off of 0.5 was used to decide if an item  
24 loaded on a specific component. PCA with varimax orthogonal rotation was  
25 performed to ensure independence of the items.  
26  
27  
28  
29  
30  
31  
32  
33  
34  
35  
36

37 Reliability testing included assessments of internal consistency and test-retest  
38 reliability. Internal consistency for total and subscale scores was estimated using the  
39 Cronbach's alpha coefficient, and the cut-off scores for acceptable reliability was set  
40 to item-total correlations of  $\geq 0.5$  and that the Cronbach's alpha would not be  
41 increased by item deletion [23]. Test-retest reliability was evaluated through the  
42 Pearson correlation coefficient ( $r$ ) and a single measure two-way mixed effects model  
43 intra-class correlation (ICC), where an ICC  $> 0.80$  was taken to indicate satisfactory  
44 reliability [24]. The paired t-test was used to determine whether mean scores of the  
45 test and retest questionnaires differed significantly. All statistical significance  
46 decisions were based on two-tailed P values of  $< 0.05$ . All data analyses were  
47 conducted using the SPSS 17.0 software.  
48  
49  
50  
51  
52  
53  
54  
55  
56  
57  
58  
59  
60

## Results

### Demographic characteristics of the study group

Table 1 shows the demographic characteristics of the study group. The sample consisted of 92.6% female and 7.4% male staff. The mean age was 31.6 years (SD  $\pm$  10.1) with an average length of work experience in healthcare of 8.1 years (SD  $\pm$  7.4). The percentage of ethnic minorities was more than one fourth. Most participants were registered nurses (67.2%) and enrolled nurses (17.8%). About one third (33.2%) of the participants had a bachelor's degree or higher (see Table 1).

### Construct validity

The results of the PCA with Bartlett's test ( $p < 0.0001$ ) and the KMO Measure (0.91) indicated that correlations between items were sufficiently large to perform the PCA. As shown in Table 2, the PCA resulted in a three-component rotated solution that explained 73.3% of the total variance in data. The first and second component consisted of five items (loadings between 0.58 and 0.83 vs. loadings between 0.68 and 0.82), where the first component confirmed the sub-scale 'A climate of safety' and where the second component confirmed the sub-scale 'A climate of everydayness' in the setting. The third component comprised four items (loadings between 0.64 and 0.87), and confirmed the sub-scale 'A climate of community'.

### Reliability

Table 2 shows that the Cronbach's alpha coefficient of the 14-item Chinese PCQ-S was 0.89 for the total scale, 0.87 for the safety subscale, 0.90 for the everydayness subscale and 0.88 for the community subscale, indicating a strong internal consistency reliability overall. Furthermore, the corrected item-total correlations for all items ranged from 0.54 to 0.79, indicating that each item correlated adequately with the total score and thus that the scale is homogenous without any item being redundant (Table 3).

Table 4 presents the results from the test-retest reliability assessment of the Chinese

1  
2  
3  
4  
5  
6  
7  
8  
9  
10  
11  
12  
13  
14  
15  
16  
17  
18  
19  
20  
21  
22  
23  
24  
25  
26  
27  
28  
29  
30  
31  
32  
33  
34  
35  
36  
37  
38  
39  
40  
41  
42  
43  
44  
45  
46  
47  
48  
49  
50  
51  
52  
53  
54  
55  
56  
57  
58  
59  
60

PCQ-S. According to the Pearson's correlation coefficient analyses, the Chinese PCQ-S indicated high correlation between test and retest on all scale levels, for with the sub-scale 'a climate of safety' ( $r = 0.88$ ,  $P < 0.01$ ), 'a climate of everydayness' ( $r = 0.91$ ,  $P < 0.01$ ), and 'a climate of community' ( $r = 0.79$ ,  $P < 0.01$ ) as well as on the overall scale scores between test and retest ( $r = 0.93$ ,  $P < 0.01$ ). A paired t-test also confirmed that there was no significant difference between the mean scores of the PCQ-S at the test and retest ratings ( $P > 0.05$ ). The ICC of the total score between the test and retest times was 0.97, providing further support that the scale had satisfactory test-retest reliability.

## Discussion

The original PCQ-S created by Edvardsson and colleagues [18, 19] is one of the most commonly used instruments to evaluate to what extent the climate of care environments are experienced as being person-centred by staff. It has been validated with older persons being cared for in hospitals, and shown to have satisfactory psychometric properties. To date, three different language versions of the PCQ-S have been validated in Western countries, and shown to have appropriate psychometric properties in Australian and Norwegian populations [20, 25]. However, this is the first study to validate the PCQ-S in an Asian population, and the results of the present study indicated that the cross-culturally adapted Chinese version PCQ-S showed excellent reliability and validity for evaluating staff perceptions of person-centredness in Chinese hospital contexts, which enables further studies and international comparisons.

In this study, the English PCQ-S was cross-culturally adapted into the Chinese version and showed satisfactory psychometric properties (construct validity, test-retest reliability and internal consistency). Construct validity was estimated using PCA with varimax orthogonal rotation resulted in a stable three-factor solution explaining 73.3% of the total variance. The ICC for the overall Chinese PCQ-S scale was 0.97 and for the three subscales was 0.93, 0.95 and 0.92, demonstrating the test-retest

1  
2  
3 reliability of the overall scale and different domains were all found to be excellent.  
4  
5 Furthermore, strong internal consistency of the Chinese PCQ-S was demonstrated as  
6  
7 evidenced through a Cronbach's alpha of 0.89 for the total scale, 0.87 for the safety  
8  
9 subscale, 0.90 for the everydayness subscale and 0.88 for the community subscale.  
10

11  
12 This Chinese version PCQ-S showed the same sub-scale structure as the Swedish and  
13  
14 Norwegian versions - a structure with the three subscales described above (a climate  
15  
16 of safety, everydayness and community) consisted of 14 items. Even though the  
17  
18 original English version PCQ-S described a slightly different structure consisting of  
19  
20 three subscales, the instrument developers have recently suggested to keep with the  
21  
22 three subscale structure for scoring and comparison purposes as this confirms the  
23  
24 theory on which the scale rests [18].  
25

26  
27 In the Chinese PCQ-S, the ICC (0.97) and Cronbach's alpha for the total scale (0.94)  
28  
29 was much higher than recorded in Swedish (0.51 vs. 0.88) and English (0.75 vs. 0.89)  
30  
31 version, and the Cronbach's alpha for the total scale was also higher than the  
32  
33 Norwegian version (0.92), indicating the Chinese PCQ-S had stronger test-retest  
34  
35 reliability and internal consistency compared to other language versions of the PCQ-S.  
36  
37 The results demonstrated that the Chinese PCQ-S has good reproducibility and well  
38  
39 maintain the properties of the original version which can be used in Chinese hospital  
40  
41 environments.  
42

43  
44 The following limitations of the present study should be noted. First, the study  
45  
46 employed a convenience sampling method to select staff in palliative care from public  
47  
48 hospitals, which may limit the ability to generalize the results to a larger population of  
49  
50 staff in Chinese hospitals and beyond. Second, the Chinese PCQ-S questionnaire has  
51  
52 been tested only in this hospital environment, further psychometric testing of the scale  
53  
54 in other settings like nursing homes would be helpful to enable further rigorous  
55  
56 comparisons of Chinese PCQ-S in different contexts and settings.  
57

## Conclusion

The 14-item Chinese version PCQ-S is a cross-culturally adapted version of the English PCQ-S, which showed excellent psychometric properties in terms of reliability and validity for evaluating staff perceptions of the person-centredness in Chinese hospital environments.

## Ethical approval and consent to participate

This study was approved by the Ethics Committee of Kunming Medical University. Oral informed consent was obtained from all persons participating in the study.

## Availability of data and material

The datasets used and/or analysed during the current study is available from the corresponding author on reasonable request.

## Competing interests

The authors declare that there are no conflicts of interest.

## Funding

The study was supported by grants from the National Natural Science Fund of China (Grant number: 81611130077), the Swedish Research Council (Grant number: 2015-06243) and Major Union Specific Project Foundation of Yunnan Provincial Science and Technology Department and Kunming Medical University (2016).

## Authors' contributions

CL (Kunming Medical University, China) was responsible for the study design, data analysis, and drafting the paper. GA (Lund University, Sweden), TP (Kunming Medical University, China) and MK (the third people's hospital of Kunming, China) contributed to the study design and provided comments on the paper during the writing process. DE (La Trobe University, Australia) and LB (Lund University, Sweden) provided comments on the paper during the writing process. FH, ZJ and JY

1  
2  
3 (the third people's hospital of Kunming, China) were responsible for the data  
4 collection.  
5  
6  
7

### 8 9 **Acknowledgements**

10 We would like to thank Ms Yang Jingjing and Ms Wu Chao, two postgraduates of  
11 School of Public Health, Kunming Medical University, who helped us with data  
12 collection and Magnus Persson, Lund University, Sweden for providing comments on  
13 the paper.  
14  
15  
16  
17  
18  
19  
20  
21  
22  
23  
24  
25  
26  
27  
28  
29  
30  
31  
32  
33  
34  
35  
36  
37  
38  
39  
40  
41  
42  
43  
44  
45  
46  
47  
48  
49  
50  
51  
52  
53  
54  
55  
56  
57  
58  
59  
60

## References

1. **Sixth National Population Census of the People's Republic of China.** Beijing, China: National Bureau of Statistics of China; 2011.
2. **World population prospects: the 2012 revision.** New York, United States: Department of Economic and Social Affairs (DoEaSA), Population Division, United Nations; 2013.
3. Dong H-J, Wressle E, Marcusson J: **Multimorbidity patterns of and use of health services by Swedish 85-year-olds: an exploratory study.** *BMC Geriatrics* 2013, **13**(1):120-120.
4. Liao C-C, Li C-R, Lee S-H, Liao W-C, Liao M-Y, Lin J, Yeh C-J, Lee M-C: **Social support and mortality among the aged people with major diseases or ADL disabilities in Taiwan: A national study.** *Archives of Gerontology & Geriatrics* 2015, **60**(2):317-321.
5. McGilton KS, Heath H, Chu CH, Bostrom AM, Mueller C, Boscart VM, McKenzie-Green B, Moghabghab R, Bowers B: **Moving the agenda forward: a person-centred framework in long-term care.** *Int J Older People Nurs* 2012, **7**(4):303-309.
6. Winefield H. MT, Clifford J., Farmer E.: **The search for reliable and valid measures of patient-centredness.** *Psychol Health* 1996(11):811-824.
7. Edvardsson DW, B. Sandman, P O.: **Person-centred care of people with severe Alzheimer's disease: current status and ways forward.** *Lancet Neurology* 2008(4):362.
8. McCormack B: **Person-centredness in gerontological nursing: an overview of the literature.** *J Clin Nurs* 2004, **13**(3a):31-38.
9. McCance T, Slater P, McCormack B: **Using the caring dimensions inventory as an indicator of person-centred nursing.** *Journal of Clinical Nursing* 2009, **18**(3):409-417.
10. Buckley C, McCormack B, Ryan A: **Valuing narrative in the care of older people: A framework of narrative practice for older adult residential care settings.** *Journal of Clinical Nursing* 2014, **23**(17-18):2565-2577.
11. Edvardsson D, Fetherstonhaugh D, Nay R: **Promoting a continuation of self and normality: person-centred care as described by people with dementia, their family members and aged care staff.** *Journal of Clinical Nursing* 2010, **19**(17-18):2611-2618.
12. McCormack B, Dewing J, Breslin L, Coyne-Nevin A, Kennedy K, Manning M, Peelo-Kilroe L, Tobin C, Slater P: **Developing person-centred practice: nursing outcomes arising from changes to the care environment in residential settings for older people.** *Int J Older People Nurs* 2010, **5**(2):93-107.
13. Crandall LG, White DL, Schuldheis S, Talerico KA: **Initiating person-centered care practices in long-term care facilities.** *Journal of Gerontological Nursing* 2007, **33**(11):47-56.
14. McCormack B, McCance TV: **Development of a framework for person-centred nursing.** *Journal of Advanced Nursing* 2006, **56**(5):472-479.



15. Edvardsson D, Fetherstonhaugh D, McAuliffe L, Nay R, Chenco C: **Job satisfaction amongst aged care staff: exploring the influence of person-centered care provision.** *Int Psychogeriatr* 2011, **23**(8):1205-1212.
16. McKeown J, Clarke A, Ingleton C, Ryan T, Repper J: **The use of life story work with people with dementia to enhance person-centred care.** *International Journal of Older People Nursing* 2010, **5**(2):148-158.
17. Bone C, Cheung G, Wade B: **Evaluating person centred care and Dementia Care Mapping in a psychogeriatric hospital in New Zealand: a pilot study.** *New Zealand Journal of Occupational Therapy* 2010, **57**(1):35-40.
18. Edvardsson D, Sandman PO, Rasmussen B: **Construction and psychometric evaluation of the Swedish language Person-centred Climate Questionnaire - staff version.** *J Nurs Manag* 2009, **17**(7):790-795.
19. Edvardsson D, Sjogren K, Lindkvist M, Taylor M, Edvardsson K, Sandman PO: **Person-centred climate questionnaire (PCQ-S): establishing reliability and cut-off scores in residential aged care.** *J Nurs Manag* 2015, **23**(3):315-323.
20. Edvardsson D, Koch S, Nay R: **Psychometric evaluation of the English language Person-centred Climate Questionnaire--staff version.** *J Nurs Manag* 2010, **18**(1):54-60.
21. Guillemin F: **Cross-cultural adaptation and validation of health status measures.** *Scand J Rheumatol* 1995, **24**(2):61-63.
22. Beaton DE, Bombardier C, Guillemin F, Ferraz MB: **Guidelines for the process of cross-cultural adaptation of self-report measures.** *Spine (Phila Pa 1976)* 2000, **25**(24):3186-3191.
23. Bland JM, Altman DG: **Cronbach's alpha.** *BMJ* 1997, **314**(7080):572.
24. Landis JR, Koch GG: **The measurement of observer agreement for categorical data.** *Biometrics* 1977, **33**(1):159-174.
25. Bergland A, Kirkevold M, Edvardsson D: **Psychometric properties of the Norwegian Person-centred Climate Questionnaire from a nursing home context.** *Scand J Caring Sci* 2012, **26**(4):820-828.



**Table 1 Demographic characteristics of the study sample (n=163)**

| Characteristics    | n (%)      |
|--------------------|------------|
| Gender             |            |
| Female             | 151 (92.6) |
| Male               | 12 (7.4)   |
| Age (years)        |            |
| 18-30              | 95 (58.3)  |
| 31-39              | 33 (20.2)  |
| ≥40                | 35 (21.5)  |
| Level of education |            |
| High school        | 7 (4.3)    |
| Secondary school   | 37 (22.7)  |
| Junior college     | 65 (39.9)  |
| Bachelor or higher | 54 (33.2)  |
| Ethnicity          |            |
| Han                | 118 (72.4) |
| Minorities         | 45 (27.6)  |
| Healthcare staff   |            |
| Registered nurse   | 101 (62.0) |
| Enrolled nurse     | 29 (17.8)  |
| Physician          | 33 (20.2)  |

**Table 2 Rotated component matrix for PCA of the Chinese PCQ-S (n=163)**

| Item number                     | Item content                                                                          | Factor loadings                       |                                             |                                          |
|---------------------------------|---------------------------------------------------------------------------------------|---------------------------------------|---------------------------------------------|------------------------------------------|
|                                 |                                                                                       | Subscale 1:<br>A climate of<br>safety | Subscale 2:<br>A climate of<br>everydayness | Subscale 3:<br>A climate of<br>community |
| 1                               | A place where I feel welcome                                                          | 0.83                                  |                                             |                                          |
| 2                               | A place where I feel acknowledged as<br>a person                                      | 0.84                                  |                                             |                                          |
| 3                               | A place where I feel I can be myself                                                  | 0.58                                  |                                             |                                          |
| 4                               | A place where the patients are in safe<br>hands                                       | 0.66                                  |                                             |                                          |
| 5                               | A place where the staff use a language<br>that the patients can understand            | 0.60                                  |                                             |                                          |
| 6                               | A place which feels homely even<br>though it is in an institution                     |                                       | 0.82                                        |                                          |
| 7                               | A place where there is something nice<br>to look at                                   |                                       | 0.81                                        |                                          |
| 8                               | A place where it is quiet and peaceful                                                |                                       | 0.78                                        |                                          |
| 9                               | A place where it is possible to get<br>unpleasant thoughts out of your head           |                                       | 0.74                                        |                                          |
| 10                              | A place which is neat and clean                                                       |                                       | 0.68                                        |                                          |
| 11                              | A place where it is easy for the patients<br>to keep in contact with their loved ones |                                       |                                             | 0.64                                     |
| 12                              | A place where it is easy for the patients<br>to receive visitors                      |                                       |                                             | 0.87                                     |
| 13                              | A place where it is easy for the patients<br>to talk to the staff                     |                                       |                                             | 0.85                                     |
| 14                              | A place where the patients have<br>someone to talk to if they so wish                 |                                       |                                             | 0.66                                     |
| Total variance<br>explained (%) | 73.3 (total 3 subscales)                                                              | 55.6                                  | 9.5                                         | 8.2                                      |
| Cronbach's alpha                | 0.94 (total 14 items)                                                                 | 0.87                                  | 0.90                                        | 0.88                                     |

**Table 3 Item performance and reliability test of the Chinese PCQ-S  
(n=163)**

| Item number | Item content                                                                       | Mean $\pm$ SD   | Corrected item-<br>total correction | Cronbach's alpha<br>if item deleted |
|-------------|------------------------------------------------------------------------------------|-----------------|-------------------------------------|-------------------------------------|
| 1           | A place where I feel welcome                                                       | 4.04 $\pm$ 0.93 | 0.62                                | 0.93                                |
| 2           | A place where I feel acknowledged as a person                                      | 4.07 $\pm$ 0.92 | 0.54                                | 0.93                                |
| 3           | A place where I feel I can be myself                                               | 3.58 $\pm$ 1.32 | 0.70                                | 0.93                                |
| 4           | A place where the patients are in safe hands                                       | 4.06 $\pm$ 0.96 | 0.72                                | 0.93                                |
| 5           | A place where the staff use a language that the patients can understand            | 3.90 $\pm$ 1.01 | 0.72                                | 0.93                                |
| 6           | A place which feels homely even though it is in an institution                     | 3.80 $\pm$ 1.13 | 0.77                                | 0.93                                |
| 7           | A place where there is something nice to look at                                   | 3.60 $\pm$ 1.15 | 0.76                                | 0.93                                |
| 8           | A place where it is quiet and peaceful                                             | 3.80 $\pm$ 1.04 | 0.78                                | 0.93                                |
| 9           | A place where it is possible to get unpleasant thoughts out of your head           | 3.20 $\pm$ 1.34 | 0.66                                | 0.93                                |
| 10          | A place which is neat and clean                                                    | 3.85 $\pm$ 1.01 | 0.70                                | 0.93                                |
| 11          | A place where it is easy for the patients to keep in contact with their loved ones | 3.88 $\pm$ 1.03 | 0.79                                | 0.93                                |
| 12          | A place where it is easy for the patients to receive visitors                      | 3.40 $\pm$ 1.36 | 0.59                                | 0.93                                |
| 13          | A place where it is easy for the patients to talk to the staff                     | 3.72 $\pm$ 1.16 | 0.71                                | 0.93                                |
| 14          | A place where the patients have someone to talk to if they so wish                 | 3.94 $\pm$ 1.03 | 0.67                                | 0.93                                |

**Table 4 Test-retest reliability of the Chinese PCQ-S (n=163)**

| Scale dimension           | 1st test<br>(Mean $\pm$ SD) | 2nd test<br>(Mean $\pm$ SD) | P    | Pearson correlation<br>coefficient ( r) | ICC (95% CI)      |
|---------------------------|-----------------------------|-----------------------------|------|-----------------------------------------|-------------------|
| A climate of safety       | 19.7 $\pm$ 4.2              | 19.8 $\pm$ 4.0              | 0.30 | 0.88                                    | 0.93 (0.91, 0.95) |
| A climate of everydayness | 18.3 $\pm$ 4.8              | 18.1 $\pm$ 4.9              | 0.38 | 0.91                                    | 0.95 (0.93, 0.96) |
| A climate of community    | 15.0 $\pm$ 4.0              | 14.7 $\pm$ 4.1              | 0.18 | 0.79                                    | 0.92 (0.89, 0.94) |
| Overall scale             | 52.9 $\pm$ 11.4             | 52.6 $\pm$ 11.7             | 0.40 | 0.93                                    | 0.97 (0.95-0.98)  |

For peer review only

# BMJ Open

## Psychometric evaluation of the Chinese version of the Person-centred Climate Questionnaire for staff

|                                 |                                                                                                                                                                                                                                                                                                                                                                                                                                                    |
|---------------------------------|----------------------------------------------------------------------------------------------------------------------------------------------------------------------------------------------------------------------------------------------------------------------------------------------------------------------------------------------------------------------------------------------------------------------------------------------------|
| Journal:                        | <i>BMJ Open</i>                                                                                                                                                                                                                                                                                                                                                                                                                                    |
| Manuscript ID                   | bmjopen-2017-017250.R1                                                                                                                                                                                                                                                                                                                                                                                                                             |
| Article Type:                   | Research                                                                                                                                                                                                                                                                                                                                                                                                                                           |
| Date Submitted by the Author:   | 12-Jun-2017                                                                                                                                                                                                                                                                                                                                                                                                                                        |
| Complete List of Authors:       | Cai, Le; School of Public Health<br>Ahlström, Gerd; Lunds Universitet<br>Tang, Pingfen; Kunming Medical University<br>Ma, Ke; The third people's hospital of Kunming<br>Edvardsson, David; La Trobe University School of Nursing and Midwifery<br>Behm, Lina; Lunds Universitet<br>Fu, Haiyan; the third people's hospital of Kunming<br>Zhang, Jie; the third people's hospital of Kunming<br>Yang, Jiqun; the third people's hospital of Kunming |
| <b>Primary Subject Heading</b>: | Nursing                                                                                                                                                                                                                                                                                                                                                                                                                                            |
| Secondary Subject Heading:      | Geriatric medicine, Palliative care, Patient-centred medicine                                                                                                                                                                                                                                                                                                                                                                                      |
| Keywords:                       | GERIATRIC MEDICINE, PALLIATIVE CARE, Person-centred care, Psychometric evaluation, China, Nursing staff                                                                                                                                                                                                                                                                                                                                            |
|                                 |                                                                                                                                                                                                                                                                                                                                                                                                                                                    |

SCHOLARONE™  
Manuscripts

Only

# Psychometric evaluation of the Chinese version of the Person-centred Climate Questionnaire for staff

Cai Le <sup>1</sup>, Gerd Ahlström <sup>2</sup>, Tang Pingfen <sup>1</sup>, Ma Ke <sup>3</sup>, David Edvardsson <sup>4</sup>, Lina Behm <sup>2</sup>, Fu Haiyan <sup>3</sup>, Zhang Jie <sup>3</sup> and Yang Jiqun <sup>3</sup>

Address: <sup>1</sup> 1168 Yu Hua Street Chun Rong Road, Cheng Gong New City, School of Public Health, Kunming Medical University, Kunming 650500, China;

<sup>2</sup> Department of Health Sciences, Faculty of Medicine, Lund University, Sweden;

<sup>3</sup> Division of palliative care, the third people's hospital of Kunming, China;

<sup>4</sup> Austin Health/Northern Health Clinical Schools of Nursing College of Science, Health and Engineering, La Trobe University, Australia

Email address:

Cai Le \* : [1018606825@qq.com](mailto:1018606825@qq.com);

Gerd Ahlström: [gerd.ahlstrom@med.lu.se](mailto:gerd.ahlstrom@med.lu.se);

Tang Pingfen: [yangyi57@vip.126.com](mailto:yangyi57@vip.126.com);

Ma Ke: [kmmake@126.com](mailto:kmmake@126.com);

David Edvardsson: [D.Edvardsson@latrobe.edu.au](mailto:D.Edvardsson@latrobe.edu.au);

Lina Behm: [Lina.behm@med.lu.se](mailto:Lina.behm@med.lu.se);

Fu Haiyan: [fuhaiyan0622@163.com](mailto:fuhaiyan0622@163.com);

Zhang Jie: [13888437137@126.com](mailto:13888437137@126.com);

Yang Jiqun: [1181780508@qq.com](mailto:1181780508@qq.com)

\* Corresponding author

Cai Le, Address: 1168 Yu Hua Street Chun Rong Road, Cheng Gong New City, School of Public Health, Kunming Medical University, Kunming 650500, China,

Email: [1018606825@qq.com](mailto:1018606825@qq.com), Phone : 86-871-65922915

**Word count 3124**

# Psychometric evaluation of the Chinese version of the Person-centred Climate Questionnaire for staff

## Abstract

### Objectives

The aim of the study was to conduct a cross-cultural adaptation of the English version of the Person-centred Climate Questionnaire – staff version (PCQ-S) — for Chinese palliative care staff and to evaluate the psychometric properties of the translated Chinese version in a hospital context.

### Design

This was a cross-sectional design. The 14-item English PCQ-S was translated and backtranslated using established procedures. Construct validity and reliability including internal consistency and test-retest reliability were assessed among hospital staffs. Construct validity was tested using Principal component analysis (PCA). Internal consistency was tested using Cronbach's alpha. Test-retest reliability was evaluated through the Pearson correlation coefficient ( $r$ ) and intra-class correlation coefficient (ICC).

### Setting

This study was conducted in three hospitals in Kunming, the capital of the Yunnan province in south-west China.

### Participants

A sample of hospital staff ( $n=163$ ) on duty at the departments of palliative care in three hospitals of Kunming consented to participate in the study.

### Results

The results confirmed that the 14-item Chinese PCQ-S consisted of the three subscales shown in other language versions. It showed strong internal consistency through a Cronbach's alpha of 0.94 for the total scale, 0.87 for the safety subscale, 0.90 for the everydayness subscale and 0.88 for the community subscale. The Chinese

1  
2  
3 PCQ-S had high test-retest reliability as evidenced by a high correlation coefficient on  
4 all scale levels between test and retest scores, on 'a climate of safety' ( $r = 0.88$ ,  
5  $P < 0.01$ ), 'a climate of everydayness' ( $r = 0.91$ ,  $P < 0.01$ ), 'a climate of community'  
6 ( $r = 0.79$ ,  $P < 0.01$ ) and on overall scale scores ( $r = 0.93$ ,  $P < 0.01$ ). The ICC to evaluate  
7 the test-retest reliability was 0.97 (95% CI: 0.95- 0.98).  
8  
9

### 10 11 12 **Conclusions**

13  
14 The Chinese version of PCQ-S is a seemingly valid and reliable tool, which showed  
15 satisfactory reliability and validity for assessing staff perceptions of the  
16 person-centredness climate in Chinese hospital environments.  
17  
18  
19

20  
21  
22 **Keywords:** Geriatric medicine; China; Nursing staff; Palliative care; Person-centred  
23 care; Psychometric evaluation  
24  
25  
26

### 27 28 **Article summary**

29 Strengths and limitations of this study

- 30 ● The first study to validate the PCQ-S in an Asian population.
- 31 ● High response rate (90%) in this study.
- 32 ● Convenience sampling method may limit the ability to generalize the results.
- 33 ● The Chinese PCQ-S has been tested only in this hospital palliative care  
34 environment.  
35  
36  
37  
38  
39  
40  
41  
42  
43  
44  
45  
46  
47  
48  
49  
50  
51  
52  
53  
54  
55  
56  
57  
58  
59  
60



## INTRODUCTION

Population aging is a global phenomenon and has become a significant public health problem worldwide. Along with the high-speed economic growth and demographic change in the last two decades, China is becoming one of the most rapidly ageing countries in the world. The proportion of older people aged 60 years or more was 13.3% in 2010[1], and is projected to reach 32.8% by 2050[2]. Studies have indicated that older people are more likely to suffer from various diseases, and more particularly chronic disease and comorbidity, which is more difficult to cure due to complexity and coexistence[3]. Chronic diseases may result in disability in older people; therefore, the rising number of older people increases the demand for hospitalization and special care and support from multiple care professionals and providers[4]. This presents a key challenge for Chinese healthcare systems to provide high-quality care for this group. Rapid population ageing in China is also increasing the numbers of older people who are likely to require palliative care in response to higher levels of poor health and chronic diseases. However, palliative care in China has developed more slowly than in high-income Western countries. Palliative care is rooted in harmony between mind and body in traditional Chinese medicine (TCM) with its long history developed over a few thousand years[5, 6].

In recent decades, person-centred care (PCC) has become recognized as a quality focus of elderly care services, which emphasizes the individual's perspective and active participation in the care process[7]. PCC as a concept implies in various ways assisting an individual to be able to be a "whole" human being, by encouraging them to participate in decisions and adjusting the physical environment and the content of the care to fit the needs of each individual. It is defined as 'valuing people as individuals' in delivering health care[8] and is based on people's subjective experience of illness instead of the disease[9-11]. The care process becomes the foundation for how PCC should be provided and the relationship between the professional caregiver and the care recipient becomes essential[12-14].

1  
2  
3  
4  
5  
6  
7  
8  
9  
10  
11  
12  
13  
14  
15  
16  
17  
18  
19  
20  
21  
22  
23  
24  
25  
26  
27  
28  
29  
30  
31  
32  
33  
34  
35  
36  
37  
38  
39  
40  
41  
42  
43  
44  
45  
46  
47  
48  
49  
50  
51  
52  
53  
54  
55  
56  
57  
58  
59  
60

Person-centredness is now regarded as a central feature of high-quality long-term care for older persons. As such PCC must be a part of the care organisation priorities, and the system needs to support and sustain this change through policy and procedures, job descriptions and education[15]. PCC improves autonomy in elderly care through its focus on individual care plans and support for next of kin, who are seen as important resources[16]. There is evidence to indicate that the person-centredness of a setting is associated with staff's satisfaction with work[17], and staff perceptions of and relationships with patients are crucially important to quality care. Also, for the older person, a person-centered setting has been shown to increase wellbeing and decrease discomfort[18, 19].

Internationally, various instruments have been developed to evaluate the PCC perspectives of professionals who work in elderly care facilities, which include the Person-centred Climate Questionnaire — staff version (PCQ-S)[20], the Person-centered Care Assessment Tool (P-CAT)[21], the Staff Assessment Person Directed Care (PDC)[22], the Individualized Care (IC)[23], and the Staff Person-Centred Practices in Assisted Living (Staff PC-PAL)[24].

Edvardsson and colleagues developed the Swedish-language Person-centred Climate Questionnaire – staff version (PCQ-S) — for evaluating to what extent the climate of care environments is experienced as being person-centred by staff[20, 25]. The questionnaire comprises three subscales (safety, everydayness, and community). It has been validated with older persons being cared for in hospitals, and shown to have satisfactory psychometric properties, which has a total Cronbach's alpha of 0.88 and values of 0.84, 0.80, 0.77 respectively for the three subscales, and satisfactory test-retest reliability, which showed an average measure intra-class correlation coefficient of 0.51 with a 95% confidence interval ranging from 0.47 to 0.75. It is one of the most commonly used instruments internationally. This instrument has been translated from Swedish into Norwegian[26], English[27] and Slovenian[28]. Both the original and the translated Norwegian, English and Slovenian scales have been demonstrated to be

1  
2  
3  
4  
5  
6  
7  
8  
9  
10  
11  
12  
13  
14  
15  
16  
17  
18  
19  
20  
21  
22  
23  
24  
25  
26  
27  
28  
29  
30  
31  
32  
33  
34  
35  
36  
37  
38  
39  
40  
41  
42  
43  
44  
45  
46  
47  
48  
49  
50  
51  
52  
53  
54  
55  
56  
57  
58  
59  
60

valid and reliable tools for assessing staff perceptions of person-centredness. However, there exists no Chinese version of the PCQ-S so far, which presents a barrier to measuring and developing person-centred care and to conducting further studies in China with possibilities of making international comparisons. We believe that among the existing tools, the English PCQ-S was the most favourable one for adaptation to the Chinese context due to the rigorous theoretical underpinnings deriving from the perception of person-centredness as emerging from experiences of the whole caring environment, which rings true in Chinese culture as well. So the purpose of this study was to conduct a cross-cultural adaptation of the English version of PCQ-S for Chinese health care staff and to evaluate the psychometric properties of the translated Chinese version in a hospital palliative care context.

## METHODS

### Instrument

The English PCQ-S questionnaire consists of 14 items and has three subscales (a climate of safety, everydayness, and community)[25]. A climate of safety is measured through items 1-5, everydayness is measured through items 6-10, and community is measured through items 11-14. Scoring is performed on a 6-point Likert-type scale, ranging from 0 (No, I disagree completely) to 5 (Yes, I agree completely). Aggregated scores are calculated using simple sum scores at subscale and total scale levels, which range from 0 to 70, with higher scores indicating a setting perceived as being more person-centred. The English PCQ-S has previously been used and tested in hospital settings, and demonstrated to be a valid and reliable tool for assessing staff perceptions of the unit's person-centredness[27].

### Translation and cross-cultural adaptation of the PCQ-S

The translation and cross-cultural adaptation was carried out according to previously published international test commission guidelines[29, 30]. First, forward translation from English to Chinese was performed independently by three native Chinese, two of them university graduates with Public Health background and the other a physician

1  
2  
3 familiar with palliative care. A consensus version was obtained after a discussion  
4 between the three translators. Second, the consensus version was back-translated into  
5 English by two bilingual translators blinded to the procedures of the forward  
6 translation. However, the back-translated version was not discussed with the authors  
7 of the English-language version of the PCQ-S. Finally, a thorough comparison of the  
8 original, translated and back-translated versions was conducted by an expert  
9 committee, which consisted of all translators, three palliative care physicians and two  
10 university professors. Discrepancies in translations were discussed and resolved, a  
11 few wordings were adapted to the Chinese cultural setting, and a consensus pre-final  
12 version was established. A final Chinese version was generated after pre-testing  
13 through face-validity the pre-final version on 10 staff from a municipal hospital in  
14 Kunming. No changes were made after the pre-testing. The 10 staff participating in  
15 face-validity of the pre-final version did not subsequently take part in the study itself.  
16  
17  
18  
19  
20  
21  
22  
23  
24  
25  
26  
27  
28  
29

### 30 **Sample and participants**

31 Three municipal hospitals in Kunming, the capital of Yunnan province in south-west  
32 China, were selected through a convenience sampling method. The following  
33 inclusion criteria were used: hospital at municipal level located in Kunming city,  
34 having department of palliative care in hospital. Their participation was approved by  
35 the hospital directors. All staff (n=182) on duty (both morning and afternoon shifts on  
36 one specific day) at the departments of palliative care in these three hospitals were  
37 considered eligible for participation, and invited to complete the Chinese PCQ-S  
38 questionnaire. The sample size in our study was in accordance with the criteria  
39 proposed by Terwee et al.[31]. The eligible staff received both oral and written  
40 information about the study. Before data collection, each participant was given a full  
41 explanation of the research purpose, and was informed that they were under no  
42 obligation to participate in the study, and were allowed to withdraw from the study at  
43 any time without any prejudice or repercussions. Finally, 163 agreed to participate,  
44 representing an overall response rate of 90%. The participants completed  
45 questionnaires for both the test and retest assessments.  
46  
47  
48  
49  
50  
51  
52  
53  
54  
55  
56  
57  
58  
59  
60

### Data collection

Demographic data was collected along with the questionnaire survey including staff age, gender, level of education, duration of work experience, ethnicity and health care staff position. Each participant was assigned a number by the data collector to indicate his or her identity, so they were anonymous with regard to completing the questionnaire. Two university graduates distributed questionnaires to all appointed staff, and completed questionnaires were anonymously collected on site. To examine the test-retest reliability, all participants were asked to complete the same PCQ-S questionnaire 1 week later. Persons who were not available then were invited to complete the PCQ-S questionnaire on another day as close as possible to the 1-week post-test completion. Data were collected during October and November 2016.

### Psychometric evaluation

No variable had missing values. All complete data were included in the analysis. Construct validity was estimated using exploratory factor analysis (principal component analysis (PCA)) with both varimax orthogonal and oblique orthogonal rotation, and goodness-of-fit through confirmative factor analysis[32]. The analysis indicated no difference between the two methods, so only the results from the analysis with varimax orthogonal rotation were presented.

Bartlett's test of sphericity was used to assess whether the correlation between items was adequate based on a criterion of  $p < 0.0001$ . The Kaiser-Meyer-Olkin (KMO) statistic was used to measure sample adequacy based on a criterion of  $\geq 0.7$ . Principal components were extracted when Kaiser's criterion of eigenvalues was  $\geq 1$ . A component loading cut off of 0.5 was used to decide if an item loaded on a specific component[33]. PCA with oblique rotation was performed to ensure independence of the items.

Reliability testing included assessments of internal consistency and test-retest

1  
2  
3 reliability. Internal consistency for total and subscale scores was estimated using the  
4 Cronbach's alpha coefficient, and the cut-off scores for acceptable reliability were set  
5 to item-total correlations of  $\geq 0.5$  and in such a way that the Cronbach's alpha would  
6 not be increased by item deletion[34]. A Cronbach's alpha between  $>0.8$  and  $> 0.95$   
7 was taken to indicate that the questionnaire had good or excellent internal  
8 consistency[34]. Test-retest reliability was evaluated through the Pearson correlation  
9 coefficient (r) and a single measure two-way mixed effects model intra-class  
10 correlation (ICC), where an ICC  $>0.80$  was taken to indicate satisfactory  
11 reliability[35]. The paired t-test was used to determine whether mean scores of the test  
12 and retest questionnaires differed significantly. All statistical significance decisions  
13 were based on two-tailed P values of  $<0.05$ . All data analyses were conducted using  
14 the SPSS 17.0 software.  
15  
16  
17  
18  
19  
20  
21  
22  
23  
24  
25  
26  
27

## 28 RESULTS

### 29 Demographic characteristics of the study group

30 Table 1 shows the demographic characteristics of the study group. The sample  
31 consisted of 92.6% female and 7.4% male staff. The mean age was 31.6 years (SD  $\pm$   
32 10.1), with an average length of work experience in healthcare of 8.1 years (SD  $\pm$   
33 7.4). The percentage of ethnic minorities was more than one fourth. Most participants  
34 were registered nurses (62.0%) or enrolled nurses (17.8%). About one third (33.2%)  
35 of the participants had a Bachelor's degree or higher (see Table 1).  
36  
37  
38  
39  
40  
41  
42  
43  
44

### 45 Construct validity

46 The results of the PCA with Bartlett's test ( $p < 0.0001$ ) and the KMO Measure (0.91)  
47 indicated that correlations between items were sufficiently large to perform the PCA.  
48 Only the first three components had eigenvalues greater than one, explaining 73.3%  
49 of the total variance. Therefore, the PCA resulted in a three-component rotated  
50 solution. As shown in Table 2, the first and the second component consisted of five  
51 items (loadings between 0.58 and 0.84 vs. loadings between 0.68 and 0.82), where the  
52 first component confirmed the sub-scale 'A climate of safety' and where the second  
53  
54  
55  
56  
57  
58  
59  
60

1  
2  
3 component confirmed the sub-scale ‘A climate of everydayness’ in the setting. The  
4  
5 third component comprised four items (loadings between 0.64 and 0.87), and  
6  
7 confirmed the sub-scale ‘A climate of community’.  
8  
9

10  
11 The three-component model was also evaluated by confirmative factor analysis, and  
12  
13 goodness of fit was estimated using indices of the Root Mean Square Error of  
14  
15 Approximation (RMSEA), the Normed Fit Index (NFI) and the Comparative Fit Index  
16  
17 (CFI). The results indicated that the goodness of fit of the questionnaire was 0.78 for  
18  
19 the RMSEA, 0.91 for the NFI and 0.92 for the CFI. Thus, the confirmatory factor  
20  
21 analysis supported the exploratory findings, and the three-component model provided  
22  
23 adequate fit indices for the questionnaire.  
24  
25

### 26 **Reliability**

27  
28 Table 2 shows that the Cronbach’s alpha coefficient of the 14-item Chinese PCQ-S  
29  
30 was 0.94 for the total scale, 0.87 for the safety subscale, 0.90 for the everydayness  
31  
32 subscale and 0.88 for the community subscale, indicating a strong internal consistency  
33  
34 reliability overall. Furthermore, the corrected item-total correlations for all items  
35  
36 ranged from 0.54 to 0.79, indicating that each item correlated adequately with the  
37  
38 total score and thus that the scale is homogenous without any item being redundant  
39  
40 (Table 3).  
41  
42

43  
44 Table 4 presents the results from the test-retest reliability assessment of the Chinese  
45  
46 PCQ-S. According to the Pearson’s correlation coefficient analyses, the Chinese  
47  
48 PCQ-S indicated high correlation between test and retest on all scale levels: on the  
49  
50 sub-scales ‘a climate of safety’ ( $r = 0.88, P < 0.01$ ), ‘a climate of everydayness’ ( $r = 0.91,$   
51  
52  $P < 0.01$ ) and ‘a climate of community’ ( $r = 0.79, P < 0.01$ ) as well as on the overall scale  
53  
54 scores between test and retest ( $r = 0.93, P < 0.01$ ). A paired t-test also confirmed that  
55  
56 there was no significant difference between the mean scores of the PCQ-S at the test  
57  
58 and retest ratings ( $P > 0.05$ ). The ICC of the total score between the test and retest  
59  
60 times was 0.97, providing further support that the scale had satisfactory test–retest



1  
2  
3 reliability.  
4  
5  
6

## 7 **DISCUSSION**

8  
9 This is the first study to validate the PCQ-S in an Asian population, and the results of  
10 the present study indicated that the cross-culturally adapted Chinese version PCQ-S  
11 showed excellent reliability and validity for evaluating staff perceptions of  
12 person-centredness in Chinese hospital contexts, which enables further studies and  
13 international comparisons.  
14  
15  
16  
17

18  
19  
20 In this study, the English PCQ-S was cross-culturally adapted into the Chinese version  
21 and showed satisfactory psychometric properties (construct validity, test-retest  
22 reliability and internal consistency). During our translation of the English PCQ-S into  
23 Chinese, a minor cultural discrepancy was encountered and one item of the PCQ-S  
24 was therefore modified accordingly. In this instance, 'peaceful' was replaced by  
25 'harmonious' as this word is closer to Chinese culture. Construct validity was  
26 estimated using PCA with varimax orthogonal rotation, resulting in a stable  
27 three-factor solution explaining 73.3% of the total variance. The ICC for the overall  
28 Chinese PCQ-S scale was 0.97 and for the three subscales was 0.93, 0.95 and 0.92,  
29 demonstrating that the test-retest reliability of the overall scale and different domains  
30 was excellent. Furthermore, strong internal consistency of the Chinese PCQ-S was  
31 demonstrated, as evidenced through a Cronbach's alpha of 0.89 for the total scale,  
32 0.87 for the safety subscale, 0.90 for the everydayness subscale and 0.88 for the  
33 community subscale.  
34  
35  
36  
37  
38  
39  
40  
41  
42  
43  
44  
45  
46  
47

48  
49 This Chinese version of the PCQ-S showed the same sub-scale structure as the  
50 Swedish, Norwegian and Slovenian versions - a structure with the three subscales  
51 described above (a climate of safety, everydayness and community) consisting of 14  
52 items. However, it showed a different structure with the English PCQ-S - a  
53 four-component structure (a climate of safety, everydayness, community and  
54 comprehensibility) consisting of 14 items, which may reflect a difference in cultural  
55  
56  
57  
58  
59  
60



1  
2  
3 context. Even though the original English PCQ-S described a slightly different  
4 structure consisting of four subscales, the instrument developers have recently  
5 suggested keeping to the three subscale structure for scoring and comparison purposes  
6 as this confirms the theory on which the scale rests [20].  
7  
8  
9

10  
11  
12 In the Chinese PCQ-S, the ICC (0.97) and Cronbach's alpha for the total scale (0.94)  
13 were much higher than in the Swedish (0.51 vs. 0.88) and English (0.75 vs. 0.89)  
14 versions, and the Cronbach's alpha for the total scale was also higher than it was in  
15 the Norwegian version (0.92). Due to the larger the sample size in our study, which  
16 differs from those in the above three studies, the Chinese PCQ-S may have stronger  
17 test-retest reliability and internal consistency compared to other language versions of  
18 the PCQ-S. The results demonstrated that the Chinese PCQ-S has good  
19 reproducibility and well maintains the properties of the original version, and can thus  
20 be used in Chinese hospital environments.  
21  
22  
23  
24  
25  
26  
27  
28  
29

30  
31 The following limitations of the present study should be noted. First, the study  
32 employed a convenience sampling method to select staff in palliative care from public  
33 hospitals, which may limit the ability to generalize the results to staff in general at  
34 Chinese hospitals or other staff working other health care contexts. Second, the  
35 Chinese PCQ-S questionnaire has been tested only in this hospital environment, and  
36 further psychometric testing of the scale in other settings like nursing homes would be  
37 helpful to enable further rigorous comparisons of Chinese PCQ-S in different contexts  
38 and settings. Third, the questionnaire had been translated only from the secondary  
39 English version, not from the original Swedish version. Fourth, with respect to the  
40 psychometric assessment of the PCQ-S, criterion-related validity, convergent validity  
41 and discriminative validity were not taken into account. Further study is needed to  
42 explore this in the future. Fifth, the back-translated version was not validated, due to  
43 the cross-cultural adaptation.  
44  
45  
46  
47  
48  
49  
50  
51  
52  
53  
54  
55  
56  
57

## 58 **Conclusion**

1  
2  
3 The 14-item Chinese PCQ-S is a cross-culturally adapted version of the English  
4 PCQ-S, which showed excellent psychometric properties in terms of reliability and  
5 validity for evaluating staff perceptions of the person-centredness in Chinese hospital  
6 environments. Our results indicated that the Chinese version of the PCQ-S can be  
7 utilized for future measurement and development of person-centred care in China and  
8 for conducting cross-cultural international comparisons with for example Sweden.  
9  
10  
11  
12  
13

### 14 15 16 17 **Ethical approval and consent to participate**

18 This study was approved by the Ethics Committee of Kunming Medical University.  
19 Oral and written informed consent was obtained from all persons participating in the  
20 study.  
21  
22  
23  
24

### 25 26 **Availability of data and material**

27 The datasets used and/or analysed during the current study are available from the  
28 corresponding author on request.  
29  
30  
31  
32

### 33 34 **Competing interests**

35 The authors declare that there are no conflicts of interest.  
36  
37  
38

### 39 40 **Consent for publication**

41 Not applicable.  
42  
43  
44

### 45 46 **Funding**

47 The study was supported by grants from the National Natural Science Fund of China  
48 (Grant number: 81611130077), the Swedish Research Council (Grant number:  
49 2015-06243) and the Major Union Specific Project Foundation of Yunnan Provincial  
50 Science and Technology Department and Kunming Medical University (2016).  
51  
52  
53  
54

### 55 56 **Authors' contributions**

57 CL (Kunming Medical University, China) was responsible for the study design, data  
58  
59  
60

1  
2  
3 analysis, and drafting the paper. GA (Lund University, Sweden), TP (Kunming  
4 Medical University, China) and MK (the third people's hospital of Kunming, China)  
5 contributed to the study design and provided comments on the paper during the  
6 writing process. DE (La Trobe University, Australia) and LB (Lund University,  
7 Sweden) provided comments on the paper during the writing process. FH, ZJ and JY  
8 (the third people's hospital of Kunming, China) were responsible for the data  
9 collection.  
10  
11  
12  
13  
14  
15  
16  
17  
18

### 19 **Acknowledgements**

20 We would like to thank Ms Yang Jingjing and Ms Wu Chao, two postgraduates of the  
21 School of Public Health, Kunming Medical University, who helped us with data  
22 collection and Magnus Persson, Lund University, Sweden for providing comments on  
23 the paper.  
24  
25  
26  
27  
28  
29  
30  
31  
32  
33  
34  
35  
36  
37  
38  
39  
40  
41  
42  
43  
44  
45  
46  
47  
48  
49  
50  
51  
52  
53  
54  
55  
56  
57  
58  
59  
60

## REFERENCES

1. Sixth National Population Census of the People's Republic of China. Beijing, China: National Bureau of Statistics of China 2011.
2. World population prospects: the 2012 revision. New York, United States: Department of Economic and Social Affairs (DoEaSA), Population Division, United Nations 2013.
3. Dong H-J, Wressle E, Marcusson J. Multimorbidity patterns of and use of health services by Swedish 85-year-olds: an exploratory study. *BMC Geriatr* 2013;13(1):120-20. doi: 10.1186/1471-2318-13-120
4. Liao C-C, Li C-R, Lee S-H, et al. Social support and mortality among the aged people with major diseases or ADL disabilities in Taiwan: A national study. *Arch Gerontol Geriatr* 2015;60(2):317-21. doi: 10.1016/j.archger.2014.11.007
5. Hsu CY, O'Connor M, Lee S. Understandings of death and dying for people of Chinese origin. *Death Stud* 2009;33(2):153-74. doi: 10.1080/07481180802440431
6. Chan CLW, Chow AYM. Death, dying and bereavement : a Hong Kong Chinese experience. Hong Kong: Hong Kong University Press 2006.
7. McGilton KS, Heath H, Chu CH, et al. Moving the agenda forward: a person-centred framework in long-term care. *Int J Older People Nurs* 2012;7(4):303-9. doi: 10.1111/opn.12010
8. Winefield H. MT, Clifford J., Farmer E. The search for reliable and valid measures of patient-centredness. *Psychol Health* 1996(11):811-24.
9. Edvardsson DW, B. Sandman, P O. Person-centred care of people with severe Alzheimer's disease: current status and ways forward. *Lancet Neurology* 2008(4):362. doi: 10.1016/S1474-4422(08)70063-2
10. McCormack B. Person-centredness in gerontological nursing: an overview of the literature. *J Clin Nurs* 2004;13(3a):31-8. doi: 10.1111/j.1365-2702.2004.00924.x
11. McCance T, Slater P, McCormack B. Using the caring dimensions inventory as an indicator of person-centred nursing. *J Clin Nurs* 2009;18(3):409-17. doi: 10.1111/j.1365-2702.2008.02466.x
12. Buckley C, McCormack B, Ryan A. Valuing narrative in the care of older people: A framework of narrative practice for older adult residential care settings. *J Clin Nurs* 2014;23(17-18):2565-77. doi: 10.1111/jocn.12472
13. Edvardsson D, Fetherstonhaugh D, Nay R. Promoting a continuation of self and normality: person-centred care as described by people with dementia, their family members and aged care staff. *J Clin Nurs* 2010;19(17-18):2611-18. doi: 10.1111/j.1365-2702.2009.03143.x
14. McCormack B, Dewing J, Breslin L, et al. Developing person-centred practice: nursing outcomes arising from changes to the care environment in residential settings for older people. *Int J Older People Nurs* 2010;5(2):93-107. doi: 10.1111/j.1748-3743.2010.00216.x
15. Crandall LG, White DL, Schultheis S, et al. Initiating person-centered care practices in long-term care facilities. *J Gerontol Nurs* 2007;33(11):47-56.
16. McCormack B, McCance TV. Development of a framework for person-centred nursing. *J Adv Nurs* 2006;56(5):472-79. doi: 10.1111/j.1365-2648.2006.04042.x
17. Edvardsson D, Fetherstonhaugh D, McAuliffe L, et al. Job satisfaction amongst aged care staff: exploring the influence of person-centered care provision. *Int Psychogeriatr* 2011;23(8):1205-12. doi: 10.1017/S1041610211000159

18. McKeown J, Clarke A, Ingleton C, et al. The use of life story work with people with dementia to enhance person-centred care. *Int J Older People Nurs* 2010;5(2):148-58. doi: 10.1111/j.1748-3743.2010.00219.x
19. Bone C, Cheung G, Wade B. Evaluating person centred care and Dementia Care Mapping in a psychogeriatric hospital in New Zealand: a pilot study. *NZJOT* 2010;57(1):35-40.
20. Edvardsson D, Sandman PO, Rasmussen B. Construction and psychometric evaluation of the Swedish language Person-centred Climate Questionnaire - staff version. *J Nurs Manag* 2009;17(7):790-5. doi: 10.1111/j.1365-2834.2009.01005.x
21. Edvardsson D, Fetherstonhaugh D, Nay R, et al. Development and initial testing of the Person-centered Care Assessment Tool (P-CAT). *Int Psychogeriatr* 2010;22(1):101-8. doi: 10.1017/S1041610209990688
22. White DL, Newton-Curtis L, Lyons KS. Development and initial testing of a measure of person-directed care. *Gerontologist* 2008;48 Spec No 1:114-23.
23. Chappell N, Reid R, Gish J. Staff-based measures of individualized care for persons with dementia in long-term care facilities. *Dementia* 2007;6(4):527-47. doi: doi:10.1177/1471301207084372
24. Zimmerman S, Allen J, Cohen LW, et al. A measure of person-centered practices in assisted living: the PC-PAL. *J Am Med Dir Assoc* 2015;16(2):132-7. doi: 10.1016/j.jamda.2014.07.016
25. Edvardsson D, Sjogren K, Lindkvist M, et al. Person-centred climate questionnaire (PCQ-S): establishing reliability and cut-off scores in residential aged care. *J Nurs Manag* 2015;23(3):315-23. doi: 10.1111/jonm.12132
26. Bergland A, Kirkevold M, Edvardsson D. Psychometric properties of the Norwegian Person-centred Climate Questionnaire from a nursing home context. *Scand J Caring Sci* 2012;26(4):820-8. doi: 10.1111/j.1471-6712.2012.00979.x
27. Edvardsson D, Koch S, Nay R. Psychometric evaluation of the English language Person-centred Climate Questionnaire--staff version. *J Nurs Manag* 2010;18(1):54-60. doi: 10.1111/j.1365-2834.2009.01038.x
28. Vrbnjak D, Pahor D, Povalej Brzan P, et al. Psychometric testing of the Slovenian Person-centred Climate Questionnaire - staff version. *J Nurs Manag* 2017 doi: 10.1111/jonm.12479
29. Guillemin F. Cross-cultural adaptation and validation of health status measures. *Scand J Rheumatol* 1995;24(2):61-3.
30. Beaton DE, Bombardier C, Guillemin F, et al. Guidelines for the process of cross-cultural adaptation of self-report measures. *Spine (Phila Pa 1976)* 2000;25(24):3186-91.
31. Terwee CB, Bot SD, de Boer MR, et al. Quality criteria were proposed for measurement properties of health status questionnaires. *J Clin Epidemiol* 2007;60(1):34-42. doi: 10.1016/j.jclinepi.2006.03.012
32. Nunnally JC, Bernstein IH. Psychometric theory. New York: McGraw-Hill 1994.
33. Pett MA, Lackey NR, Sullivan JJ. Making sense of factor analysis : the use of factor analysis for instrument development in health care research. London: SAGE 2003.
34. Bland JM, Altman DG. Cronbach's alpha. *BMJ* 1997;314(7080):572.
35. Landis JR, Koch GG. The measurement of observer agreement for categorical data. *Biometrics* 1977;33(1):159-74.

**Table 1 Demographic characteristics of the study sample (n=163)**

| Characteristics    | n (%)      |
|--------------------|------------|
| Gender             |            |
| Female             | 151 (92.6) |
| Male               | 12 (7.4)   |
| Age (years)        |            |
| 18-30              | 95 (58.3)  |
| 31-39              | 33 (20.2)  |
| ≥40                | 35 (21.5)  |
| Level of education |            |
| High school        | 7 (4.3)    |
| Secondary school   | 37 (22.7)  |
| Junior college     | 65 (39.9)  |
| Bachelor or higher | 54 (33.2)  |
| Ethnicity          |            |
| Han                | 118 (72.4) |
| Minorities         | 45 (27.6)  |
| Healthcare staff   |            |
| Registered nurse   | 101 (62.0) |
| Enrolled nurse     | 29 (17.8)  |
| Physician          | 33 (20.2)  |

**Table 2 Rotated component matrix for PCA of the Chinese PCQ-S (n=163)**

| Item number                     | Item content                                                                          | Factor loadings                       |                                             |                                          |
|---------------------------------|---------------------------------------------------------------------------------------|---------------------------------------|---------------------------------------------|------------------------------------------|
|                                 |                                                                                       | Subscale 1:<br>A climate of<br>safety | Subscale 2:<br>A climate of<br>everydayness | Subscale 3:<br>A climate of<br>community |
| 1                               | A place where I feel welcome                                                          | 0.83                                  |                                             |                                          |
| 2                               | A place where I feel acknowledged as<br>a person                                      | 0.84                                  |                                             |                                          |
| 3                               | A place where I feel I can be myself                                                  | 0.58                                  |                                             |                                          |
| 4                               | A place where the patients are in safe<br>hands                                       | 0.66                                  |                                             |                                          |
| 5                               | A place where the staff use a language<br>that the patients can understand            | 0.60                                  |                                             |                                          |
| 6                               | A place which feels homely even<br>though it is in an institution                     |                                       | 0.82                                        |                                          |
| 7                               | A place where there is something nice<br>to look at                                   |                                       | 0.81                                        |                                          |
| 8                               | A place where it is quiet and peaceful                                                |                                       | 0.78                                        |                                          |
| 9                               | A place where it is possible to get<br>unpleasant thoughts out of your head           |                                       | 0.74                                        |                                          |
| 10                              | A place which is neat and clean                                                       |                                       | 0.68                                        |                                          |
| 11                              | A place where it is easy for the patients<br>to keep in contact with their loved ones |                                       |                                             | 0.64                                     |
| 12                              | A place where it is easy for the patients<br>to receive visitors                      |                                       |                                             | 0.87                                     |
| 13                              | A place where it is easy for the patients<br>to talk to the staff                     |                                       |                                             | 0.85                                     |
| 14                              | A place where the patients have<br>someone to talk to if they so wish                 |                                       |                                             | 0.66                                     |
| Total variance<br>explained (%) | 73.3 (total 3 subscales)                                                              | 55.6                                  | 9.5                                         | 8.2                                      |
| Cronbach's alpha                | 0.94 (total 14 items)                                                                 | 0.87                                  | 0.90                                        | 0.88                                     |

**Table 3 Item performance and reliability test of the Chinese PCQ-S  
(n=163)**

| Item number | Item content                                                                       | Mean $\pm$ SD   | Corrected item:<br>total correction | Cronbach's alpha<br>if item deleted |
|-------------|------------------------------------------------------------------------------------|-----------------|-------------------------------------|-------------------------------------|
| 1           | A place where I feel welcome                                                       | 4.04 $\pm$ 0.93 | 0.62                                | 0.93                                |
| 2           | A place where I feel acknowledged as a person                                      | 4.07 $\pm$ 0.92 | 0.54                                | 0.93                                |
| 3           | A place where I feel I can be myself                                               | 3.58 $\pm$ 1.32 | 0.70                                | 0.93                                |
| 4           | A place where the patients are in safe hands                                       | 4.06 $\pm$ 0.96 | 0.72                                | 0.93                                |
| 5           | A place where the staff use a language that the patients can understand            | 3.90 $\pm$ 1.01 | 0.72                                | 0.93                                |
| 6           | A place which feels homely even though it is in an institution                     | 3.80 $\pm$ 1.13 | 0.77                                | 0.93                                |
| 7           | A place where there is something nice to look at                                   | 3.60 $\pm$ 1.15 | 0.76                                | 0.93                                |
| 8           | A place where it is quiet and peaceful                                             | 3.80 $\pm$ 1.04 | 0.78                                | 0.93                                |
| 9           | A place where it is possible to get unpleasant thoughts out of your head           | 3.20 $\pm$ 1.34 | 0.66                                | 0.93                                |
| 10          | A place which is neat and clean                                                    | 3.85 $\pm$ 1.01 | 0.70                                | 0.93                                |
| 11          | A place where it is easy for the patients to keep in contact with their loved ones | 3.88 $\pm$ 1.03 | 0.79                                | 0.93                                |
| 12          | A place where it is easy for the patients to receive visitors                      | 3.40 $\pm$ 1.36 | 0.59                                | 0.93                                |
| 13          | A place where it is easy for the patients to talk to the staff                     | 3.72 $\pm$ 1.16 | 0.71                                | 0.93                                |
| 14          | A place where the patients have someone to talk to if they so wish                 | 3.94 $\pm$ 1.03 | 0.67                                | 0.93                                |



**Table 4 Test-retest reliability of the Chinese PCQ-S (n=163)**

| Scale dimension           | 1st test<br>(Mean ± SD) | 2nd test<br>(Mean ± SD) | P    | Pearson correlation<br>coefficient ( r) | ICC (95% CI)      |
|---------------------------|-------------------------|-------------------------|------|-----------------------------------------|-------------------|
| A climate of safety       | 19.7 ± 4.2              | 19.8 ± 4.0              | 0.30 | 0.88                                    | 0.93 (0.91, 0.95) |
| A climate of everydayness | 18.3 ± 4.8              | 18.1 ± 4.9              | 0.38 | 0.91                                    | 0.95 (0.93, 0.96) |
| A climate of community    | 15.0 ± 4.0              | 14.7 ± 4.1              | 0.18 | 0.79                                    | 0.92 (0.89, 0.94) |
| Overall scale             | 52.9 ± 11.4             | 52.6 ± 11.7             | 0.40 | 0.93                                    | 0.97 (0.95-0.98)  |

For peer review only

STROBE Statement—Checklist of items that should be included in reports of *cross-sectional studies*

|                           | Item No. | Recommendation                                                                                                                                                                                                                                                                                                                                                                                                                                                         | Page No. | Relevant text from manuscript               |
|---------------------------|----------|------------------------------------------------------------------------------------------------------------------------------------------------------------------------------------------------------------------------------------------------------------------------------------------------------------------------------------------------------------------------------------------------------------------------------------------------------------------------|----------|---------------------------------------------|
| <b>Title and abstract</b> | 1        | (a) Indicate the study’s design with a commonly used term in the title or the abstract                                                                                                                                                                                                                                                                                                                                                                                 | 0        | Cross-sectional design                      |
|                           |          | (b) Provide in the abstract an informative and balanced summary of what was done and what was found                                                                                                                                                                                                                                                                                                                                                                    | 1-2      | Results, Conclusions                        |
| <b>Introduction</b>       |          |                                                                                                                                                                                                                                                                                                                                                                                                                                                                        |          |                                             |
| Background/rationale      | 2        | Explain the scientific background and rationale for the investigation being reported                                                                                                                                                                                                                                                                                                                                                                                   | 3-5      | Introduction                                |
| Objectives                | 3        | State specific objectives, including any prespecified hypotheses                                                                                                                                                                                                                                                                                                                                                                                                       | 5        | The purpose of this study                   |
| <b>Methods</b>            |          |                                                                                                                                                                                                                                                                                                                                                                                                                                                                        |          |                                             |
| Study design              | 4        | Present key elements of study design early in the paper                                                                                                                                                                                                                                                                                                                                                                                                                | 5        | Methods                                     |
| Setting                   | 5        | Describe the setting, locations, and relevant dates, including periods of recruitment, exposure, follow-up, and data collection                                                                                                                                                                                                                                                                                                                                        | -        | Sample and Participants, Data collection    |
| Participants              | 6        | (a) <i>Cohort study</i> —Give the eligibility criteria, and the sources and methods of selection of participants. Describe methods of follow-up<br><i>Case-control study</i> —Give the eligibility criteria, and the sources and methods of case ascertainment and control selection. Give the rationale for the choice of cases and controls<br><i>Cross-sectional study</i> —Give the eligibility criteria, and the sources and methods of selection of participants | 6-7      | Sample and Participants, inclusion criteria |
|                           |          | (b) <i>Cohort study</i> —For matched studies, give matching criteria and number of exposed and unexposed<br><i>Case-control study</i> —For matched studies, give matching criteria and the number of controls per case                                                                                                                                                                                                                                                 |          |                                             |
| Variables                 | 7        | Clearly define all outcomes, exposures, predictors, potential confounders, and effect modifiers. Give diagnostic criteria, if applicable                                                                                                                                                                                                                                                                                                                               | 5-8      | Results                                     |
| Data sources/ measurement | 8*       | For each variable of interest, give sources of data and details of methods of assessment (measurement). Describe comparability of assessment methods if there is more than one group                                                                                                                                                                                                                                                                                   | 5-6      | Psychometric evaluation                     |
| Bias                      | 9        | Describe any efforts to address potential sources of bias                                                                                                                                                                                                                                                                                                                                                                                                              | 11       | limitation                                  |
| Study size                | 10       | Explain how the study size was arrived at                                                                                                                                                                                                                                                                                                                                                                                                                              | 6        | Sample size                                 |

Continued on next page

|                        |     |                                                                                                                                                                                                                                                                                                           |     |                                                           |   |
|------------------------|-----|-----------------------------------------------------------------------------------------------------------------------------------------------------------------------------------------------------------------------------------------------------------------------------------------------------------|-----|-----------------------------------------------------------|---|
| Quantitative variables | 11  | Explain how quantitative variables were handled in the analyses. If applicable, describe which groupings were chosen and why                                                                                                                                                                              | 7-8 | Psychometric evaluation                                   |   |
| Statistical methods    | 12  | (a) Describe all statistical methods, including those used to control for confounding                                                                                                                                                                                                                     | 7-8 | Psychometric evaluation                                   |   |
|                        |     | (b) Describe any methods used to examine subgroups and interactions                                                                                                                                                                                                                                       |     |                                                           |   |
|                        |     | (c) Explain how missing data were addressed                                                                                                                                                                                                                                                               |     |                                                           |   |
|                        |     | (d) <i>Cohort study</i> —If applicable, explain how loss to follow-up was addressed<br><i>Case-control study</i> —If applicable, explain how matching of cases and controls was addressed<br><i>Cross-sectional study</i> —If applicable, describe analytical methods taking account of sampling strategy |     |                                                           |   |
|                        |     | (e) Describe any sensitivity analyses                                                                                                                                                                                                                                                                     |     |                                                           |   |
| <b>Results</b>         |     |                                                                                                                                                                                                                                                                                                           |     |                                                           |   |
| Participants           | 13* | (a) Report numbers of individuals at each stage of study—eg numbers potentially eligible, examined for eligibility, confirmed eligible, included in the study, completing follow-up, and analysed                                                                                                         | 6   | All staff (n=182) on duty<br>163 consented to participate |   |
|                        |     | (b) Give reasons for non-participation at each stage                                                                                                                                                                                                                                                      |     |                                                           |   |
|                        |     | (c) Consider use of a flow diagram                                                                                                                                                                                                                                                                        |     |                                                           |   |
| Descriptive data       | 14* | (a) Give characteristics of study participants (eg demographic, clinical, social) and information on exposures and potential confounders                                                                                                                                                                  | 8   | Demographic characteristics of the study group            |   |
|                        |     | (b) Indicate number of participants with missing data for each variable of interest                                                                                                                                                                                                                       |     |                                                           |   |
|                        |     | (c) <i>Cohort study</i> —Summarise follow-up time (eg, average and total amount)                                                                                                                                                                                                                          |     |                                                           |   |
| Outcome data           | 15* | <i>Cohort study</i> —Report numbers of outcome events or summary measures over time                                                                                                                                                                                                                       | 8-9 | Results                                                   |   |
|                        |     | <i>Case-control study</i> —Report numbers in each exposure category, or summary measures of exposure                                                                                                                                                                                                      |     |                                                           |   |
|                        |     | <i>Cross-sectional study</i> —Report numbers of outcome events or summary measures                                                                                                                                                                                                                        |     |                                                           |   |
| Main results           | 16  | (a) Give unadjusted estimates and, if applicable, confounder-adjusted estimates and their precision (eg, 95% confidence interval). Make clear which confounders were adjusted for and why they were included                                                                                              | 8-9 |                                                           |   |
|                        |     | (b) Report category boundaries when continuous variables were categorized                                                                                                                                                                                                                                 |     |                                                           | - |
|                        |     | (c) If relevant, consider translating estimates of relative risk into absolute risk for a meaningful time period                                                                                                                                                                                          |     |                                                           | - |

Continued on next page

1  
2  
3  
4  
5  
6  
7  
8  
9  
10  
11  
12  
13  
14  
15  
16  
17  
18  
19  
20  
21  
22  
23  
24  
25  
26  
27  
28  
29  
30  
31  
32  
33  
34  
35  
36  
37  
38  
39  
40  
41  
42  
43  
44  
45  
46  
47  
48  
49

|                          |    |                                                                                                                                                                            |       |                                                                                                                                                                                                                                          |
|--------------------------|----|----------------------------------------------------------------------------------------------------------------------------------------------------------------------------|-------|------------------------------------------------------------------------------------------------------------------------------------------------------------------------------------------------------------------------------------------|
| Other analyses           | 17 | Report other analyses done—eg analyses of subgroups and interactions, and sensitivity analyses                                                                             | -     |                                                                                                                                                                                                                                          |
| <b>Discussion</b>        |    |                                                                                                                                                                            |       |                                                                                                                                                                                                                                          |
| Key results              | 18 | Summarise key results with reference to study objectives                                                                                                                   | 10    | Discussion                                                                                                                                                                                                                               |
| Limitations              | 19 | Discuss limitations of the study, taking into account sources of potential bias or imprecision. Discuss both direction and magnitude of any potential bias                 | 11    | The following limitations of the present study should be noted                                                                                                                                                                           |
| Interpretation           | 20 | Give a cautious overall interpretation of results considering objectives, limitations, multiplicity of analyses, results from similar studies, and other relevant evidence | 10-11 |                                                                                                                                                                                                                                          |
| Generalisability         | 21 | Discuss the generalisability (external validity) of the study results                                                                                                      | 11    | First, the study employed a convenience sampling method to select staff in palliative care from public hospitals, which may limit the ability to generalize the results to a larger population of staff in Chinese hospitals and beyond. |
| <b>Other information</b> |    |                                                                                                                                                                            |       |                                                                                                                                                                                                                                          |
| Funding                  | 22 | Give the source of funding and the role of the funders for the present study and, if applicable, for the original study on which the present article is based              | 12    | Funding                                                                                                                                                                                                                                  |

\*Give information separately for cases and controls in case-control studies and, if applicable, for exposed and unexposed groups in cohort and cross-sectional studies.

**Note:** An Explanation and Elaboration article discusses each checklist item and gives methodological background and published examples of transparent reporting. The STROBE checklist is best used in conjunction with this article (freely available on the Web sites of PLoS Medicine at <http://www.plosmedicine.org/>, Annals of Internal Medicine at <http://www.annals.org/>, and Epidemiology at <http://www.epidem.com/>). Information on the STROBE Initiative is available at [www.strobe-statement.org](http://www.strobe-statement.org).

# BMJ Open

## Psychometric evaluation of the Chinese version of the Person-centred Climate Questionnaire for staff

|                                 |                                                                                                                                                                                                                                                                                                                                                                                                                                                    |
|---------------------------------|----------------------------------------------------------------------------------------------------------------------------------------------------------------------------------------------------------------------------------------------------------------------------------------------------------------------------------------------------------------------------------------------------------------------------------------------------|
| Journal:                        | <i>BMJ Open</i>                                                                                                                                                                                                                                                                                                                                                                                                                                    |
| Manuscript ID                   | bmjopen-2017-017250.R2                                                                                                                                                                                                                                                                                                                                                                                                                             |
| Article Type:                   | Research                                                                                                                                                                                                                                                                                                                                                                                                                                           |
| Date Submitted by the Author:   | 17-Jul-2017                                                                                                                                                                                                                                                                                                                                                                                                                                        |
| Complete List of Authors:       | Cai, Le; School of Public Health<br>Ahlström, Gerd; Lunds Universitet<br>Tang, Pingfen; Kunming Medical University<br>Ma, Ke; The third people's hospital of Kunming<br>Edvardsson, David; La Trobe University School of Nursing and Midwifery<br>Behm, Lina; Lunds Universitet<br>Fu, Haiyan; the third people's hospital of Kunming<br>Zhang, Jie; the third people's hospital of Kunming<br>Yang, Jiqun; the third people's hospital of Kunming |
| <b>Primary Subject Heading</b>: | Nursing                                                                                                                                                                                                                                                                                                                                                                                                                                            |
| Secondary Subject Heading:      | Geriatric medicine, Palliative care, Patient-centred medicine                                                                                                                                                                                                                                                                                                                                                                                      |
| Keywords:                       | GERIATRIC MEDICINE, PALLIATIVE CARE, Person-centred care, Psychometric evaluation, China, Nursing staff                                                                                                                                                                                                                                                                                                                                            |
|                                 |                                                                                                                                                                                                                                                                                                                                                                                                                                                    |

SCHOLARONE™  
Manuscripts

Only

# Psychometric evaluation of the Chinese version of the Person-centred Climate Questionnaire for staff

Cai Le <sup>1</sup>, Gerd Ahlström <sup>2</sup>, Tang Pingfen <sup>1</sup>, Ma Ke <sup>3</sup>, David Edvardsson <sup>4</sup>, Lina Behm <sup>2</sup>, Fu Haiyan <sup>3</sup>, Zhang Jie <sup>3</sup> and Yang Jiqun <sup>3</sup>

Address: <sup>1</sup> 1168 Yu Hua Street Chun Rong Road, Cheng Gong New City, School of Public Health, Kunming Medical University, Kunming 650500, China;

<sup>2</sup> Department of Health Sciences, Faculty of Medicine, Lund University, Sweden;

<sup>3</sup> Division of palliative care, the third people's hospital of Kunming, China;

<sup>4</sup> Austin Health/Northern Health Clinical Schools of Nursing College of Science, Health and Engineering, La Trobe University, Australia

Email address:

Cai Le \* : [1018606825@qq.com](mailto:1018606825@qq.com);

Gerd Ahlström: [gerd.ahlstrom@med.lu.se](mailto:gerd.ahlstrom@med.lu.se);

Tang Pingfen: [yangyi57@vip.126.com](mailto:yangyi57@vip.126.com);

Ma Ke: [kmmake@126.com](mailto:kmmake@126.com);

David Edvardsson: [D.Edvardsson@latrobe.edu.au](mailto:D.Edvardsson@latrobe.edu.au);

Lina Behm: [Lina.behm@med.lu.se](mailto:Lina.behm@med.lu.se);

Fu Haiyan: [fuhaiyan0622@163.com](mailto:fuhaiyan0622@163.com);

Zhang Jie: [13888437137@126.com](mailto:13888437137@126.com);

Yang Jiqun: [1181780508@qq.com](mailto:1181780508@qq.com)

\* Corresponding author

Cai Le, Address: 1168 Yu Hua Street Chun Rong Road, Cheng Gong New City, School of Public Health, Kunming Medical University, Kunming 650500, China,

Email: [1018606825@qq.com](mailto:1018606825@qq.com), Phone : [86-871-65922915](tel:86-871-65922915)

Word count [3124](#)

# Psychometric evaluation of the Chinese version of the Person-centred Climate Questionnaire for staff

## Abstract

### Objectives

The aim of the study was to evaluate the psychometric properties of the English version of the Person-centred Climate Questionnaire – staff version (PCQ-S) — for Chinese palliative care staff in a hospital context.

### Design

This was a cross-sectional design. The 14-item English PCQ-S was translated and backtranslated using established procedures. Construct validity and reliability including internal consistency and test-retest reliability were assessed among hospital staffs. Construct validity was tested using Principal component analysis (PCA). Internal consistency was tested using Cronbach's alpha. Test-retest reliability was evaluated through the weighted kappa (Kp), Pearson correlation coefficient ( $r$ ), and intra-class correlation coefficient (ICC).

### Setting

This study was conducted in three hospitals in Kunming, the capital of the Yunnan province in south-west China.

### Participants

A sample of hospital staff (n=163) on duty at the departments of palliative care in three hospitals of Kunming consented to participate in the study.

### Results

The results confirmed that the 14-item Chinese PCQ-S consisted of the three subscales shown in other language versions. It showed strong internal consistency through a Cronbach's alpha of 0.94 for the total scale, 0.87 for the safety subscale, 0.90 for the everydayness subscale and 0.88 for the community subscale. The Chinese PCQ-S had high test-retest reliability as evidenced by a high Kp coefficient and a high

1  
2  
3 correlation coefficient on all scale levels between test and retest scores, on 'a climate  
4 of safety' ( $K_p=0.77$ ,  $r = 0.88$ ,  $P<0.01$ ), 'a climate of everydayness' ( $K_p=0.82$ ,  $r=0.91$ ,  
5  $P<0.01$ ), 'a climate of community' ( $K_p=0.75$ ,  $r=0.79$ ,  $P<0.01$ ) and on overall scale  
6 scores ( $K_p=0.85$ ,  $r=0.93$ ,  $P<0.01$ ). The ICC to evaluate the test-retest reliability was  
7 0.97 (95% CI: 0.95- 0.98).  
8  
9

### 10 11 12 **Conclusions**

13  
14 The Chinese version of PCQ-S is a seemingly valid and reliable tool, which showed  
15 satisfactory reliability and validity for assessing staff perceptions of the  
16 person-centredness climate in Chinese hospital environments.  
17  
18  
19

20  
21  
22 **Keywords:** Geriatric medicine; China; Nursing staff; Palliative care; Person-centred  
23 care; Psychometric evaluation  
24  
25  
26  
27

### 28 **Article summary**

29 Strengths and limitations of this study

- 30 ● The first study to validate the PCQ-S in an Asian population.
- 31 ● High response rate (90%) in this study.
- 32 ● Convenience sampling method may limit the ability to generalize the results.
- 33 ● The Chinese PCQ-S has been tested only in this hospital palliative care  
34 environment.  
35  
36  
37  
38  
39  
40  
41  
42  
43  
44  
45  
46  
47  
48  
49  
50  
51  
52  
53  
54  
55  
56  
57  
58  
59  
60



## INTRODUCTION

Population aging is a global phenomenon and has become a significant public health problem worldwide. Along with the high-speed economic growth and demographic change in the last two decades, China is becoming one of the most rapidly ageing countries in the world. The proportion of older people aged 60 years or more was 13.3% in 2010[1], and is projected to reach 32.8% by 2050[2]. Studies have indicated that older people are more likely to suffer from various diseases, and more particularly chronic disease and comorbidity, which is more difficult to cure due to complexity and coexistence[3]. Chronic diseases may result in disability in older people; therefore, the rising number of older people increases the demand for hospitalization and special care and support from multiple care professionals and providers[4]. This presents a key challenge for Chinese healthcare systems to provide high-quality care for this group. Rapid population ageing in China is also increasing the numbers of older people who are likely to require palliative care in response to higher levels of poor health and chronic diseases. However, palliative care in China has developed more slowly than in high-income Western countries. Palliative care is rooted in harmony between mind and body in traditional Chinese medicine (TCM) with its long history developed over a few thousand years[5, 6].

In recent decades, person-centred care (PCC) has become recognized as a quality focus of elderly care services, which emphasizes the individual's perspective and active participation in the care process[7]. PCC as a concept implies in various ways assisting an individual to be able to be a "whole" human being, by encouraging them to participate in decisions and adjusting the physical environment and the content of the care to fit the needs of each individual. It is defined as 'valuing people as individuals' in delivering health care[8] and is based on people's subjective experience of illness instead of the disease[9-11]. The care process becomes the foundation for how PCC should be provided and the relationship between the professional caregiver and the care recipient becomes essential[12-14].

1  
2  
3  
4  
5  
6  
7  
8  
9  
10  
11  
12  
13  
14  
15  
16  
17  
18  
19  
20  
21  
22  
23  
24  
25  
26  
27  
28  
29  
30  
31  
32  
33  
34  
35  
36  
37  
38  
39  
40  
41  
42  
43  
44  
45  
46  
47  
48  
49  
50  
51  
52  
53  
54  
55  
56  
57  
58  
59  
60

Person-centredness is now regarded as a central feature of high-quality long-term care for older persons. As such PCC must be a part of the care organisation priorities, and the system needs to support and sustain this change through policy and procedures, job descriptions and education[15]. PCC improves autonomy in elderly care through its focus on individual care plans and support for next of kin, who are seen as important resources[16]. There is evidence to indicate that the person-centredness of a setting is associated with staff's satisfaction with work[17], and staff perceptions of and relationships with patients are crucially important to quality care. Also, for the older person, a person-centered setting has been shown to increase wellbeing and decrease discomfort[18, 19].

Internationally, various instruments have been developed to evaluate the PCC perspectives of professionals who work in elderly care facilities, which include the Person-centred Climate Questionnaire — staff version (PCQ-S)[20], the Person-centered Care Assessment Tool (P-CAT)[21], the Staff Assessment Person Directed Care (PDC)[22], the Individualized Care (IC)[23], and the Staff Person-Centred Practices in Assisted Living (Staff PC-PAL)[24].

Edvardsson and colleagues developed the Swedish-language Person-centred Climate Questionnaire – staff version (PCQ-S) — for evaluating to what extent the climate of care environments is experienced as being person-centred by staff[20, 25]. The questionnaire comprises three subscales (safety, everydayness, and community). It has been validated with older persons being cared for in hospitals, and shown to have satisfactory psychometric properties, which has a total Cronbach's alpha of 0.88 and values of 0.84, 0.80, 0.77 respectively for the three subscales, and satisfactory test-retest reliability, which showed an average measure intra-class correlation coefficient of 0.51 with a 95% confidence interval ranging from 0.47 to 0.75. It is one of the most commonly used instruments internationally. This instrument has been translated from Swedish into Norwegian[26] and English[27], and the English version has also been translated into Slovenian[28]. Both the original and the translated

1  
2  
3 Norwegian, English and Slovenian scales have been demonstrated to be valid and  
4 reliable tools for assessing staff perceptions of person-centredness. However, there  
5 exists no Chinese version of the PCQ-S so far, which presents a barrier to measuring  
6 and developing person-centred care and to conducting further studies in China with  
7 possibilities of making international comparisons. We believe that among the existing  
8 tools, the English PCQ-S was the most favourable one for adaptation to the Chinese  
9 context due to the rigorous theoretical underpinnings deriving from the perception of  
10 person-centredness as emerging from experiences of the whole caring environment,  
11 which rings true in Chinese culture as well. So the purpose of this study was to  
12 conduct a cross-cultural adaptation of the English version of PCQ-S for Chinese  
13 health care staff and to evaluate the psychometric properties of the translated Chinese  
14 version in a hospital palliative care context.  
15  
16  
17  
18  
19  
20  
21  
22  
23  
24  
25  
26  
27

## 28 **METHODS**

### 29 **Instrument**

30 The English PCQ-S questionnaire consists of 14 items and has three subscales (a  
31 climate of safety, everydayness, and community)[25]. A climate of safety is measured  
32 through items 1-5, everydayness is measured through items 6-10, and community is  
33 measured through items 11-14. Scoring is performed on a 6-point Likert-type scale,  
34 ranging from 0 (No, I disagree completely) to 5 (Yes, I agree completely). Aggregated  
35 scores are calculated using simple sum scores at subscale and total scale levels, which  
36 range from 0 to 70, with higher scores indicating a setting perceived as being more  
37 person-centred. The English PCQ-S has previously been used and tested in hospital  
38 settings, and demonstrated to be a valid and reliable tool for assessing staff  
39 perceptions of the unit's person-centredness[27].  
40  
41  
42  
43  
44  
45  
46  
47  
48  
49  
50  
51

### 52 **Translation and cross-cultural adaptation of the PCQ-S**

53 The translation and cross-cultural adaptation was carried out according to previously  
54 published international test commission guidelines[29, 30]. First, forward translation  
55 from English to Chinese was performed independently by three native Chinese, two  
56  
57  
58  
59  
60

1  
2  
3 of them university graduates with Public Health background and the other a physician  
4 familiar with palliative care. A consensus version was obtained after a discussion  
5 between the three translators. Second, the consensus version was back-translated into  
6 English by two bilingual translators blinded to the procedures of the forward  
7 translation. However, the back-translated version was not discussed with the authors  
8 of the English-language version of the PCQ-S. Finally, a thorough comparison of the  
9 original, translated and back-translated versions was conducted by an expert  
10 committee, which consisted of all translators, three palliative care physicians and two  
11 university professors. Discrepancies in translations were discussed and resolved, a  
12 few wordings were adapted to the Chinese cultural setting, and a consensus pre-final  
13 version was established. A final Chinese version was generated after pre-testing  
14 through face-validity the pre-final version on 10 staff from a municipal hospital in  
15 Kunming. No changes were made after the pre-testing. The 10 staff participating in  
16 face-validity of the pre-final version did not subsequently take part in the study itself.  
17  
18  
19  
20  
21  
22  
23  
24  
25  
26  
27  
28  
29  
30  
31

### 32 **Sample and participants**

33 Three municipal hospitals in Kunming, the capital of Yunnan province in south-west  
34 China, were selected through a convenience sampling method. The following  
35 inclusion criteria were used: hospital at municipal level located in Kunming city,  
36 having department of palliative care in hospital. Their participation was approved by  
37 the hospital directors. All staff (n=182) on duty (both morning and afternoon shifts on  
38 one specific day) at the departments of palliative care in these three hospitals were  
39 considered eligible for participation, and invited to complete the Chinese PCQ-S  
40 questionnaire. The sample size in our study was in accordance with the criteria  
41 proposed by Terwee et al.[31]. The eligible staff received both oral and written  
42 information about the study. Before data collection, each participant was given a full  
43 explanation of the research purpose, and was informed that they were under no  
44 obligation to participate in the study, and were allowed to withdraw from the study at  
45 any time without any prejudice or repercussions. Finally, 163 agreed to participate,  
46 representing an overall response rate of 90%. The participants completed  
47  
48  
49  
50  
51  
52  
53  
54  
55  
56  
57  
58  
59  
60

1  
2  
3 questionnaires for both the test and retest assessments.  
4  
5  
6

### 7 **Data collection**

8  
9 Demographic data was collected along with the questionnaire survey including staff  
10 age, gender, level of education, duration of work experience, ethnicity and health care  
11 staff position. Each participant was assigned a number by the data collector to indicate  
12 his or her identity, so they were anonymous with regard to completing the  
13 questionnaire. Two university graduates distributed questionnaires to all appointed  
14 staff, and completed questionnaires were anonymously collected on site. To examine  
15 the test-retest reliability, all participants were asked to complete the same PCQ-S  
16 questionnaire 1 week later. Persons who were not available then were invited to  
17 complete the PCQ-S questionnaire on another day as close as possible to the 1-week  
18 post-test completion. Data were collected during October and November 2016.  
19  
20  
21  
22  
23  
24  
25  
26  
27  
28

### 29 **Psychometric evaluation**

30  
31 No variable had missing values. All complete data were included in the analysis.  
32  
33 Construct validity was estimated using exploratory factor analysis (principal  
34 component analysis (PCA)) with both varimax orthogonal and oblique orthogonal  
35 rotation, and goodness-of-fit through confirmative factor analysis[32]. The analysis  
36 indicated no difference between the two methods, so only the results from the analysis  
37 with varimax orthogonal rotation were presented.  
38  
39  
40  
41  
42  
43  
44

45 Bartlett's test of sphericity was used to assess whether the correlation between items  
46 was adequate based on a criterion of  $p < 0.0001$ . The Kaiser-Meyer-Olkin (KMO)  
47 statistic was used to measure sample adequacy based on a criterion of  $\geq 0.7$ . Principal  
48 components were extracted when Kaiser's criterion of eigenvalues was  $\geq 1$ . A  
49 component loading cut off of 0.5 was used to decide if an item loaded on a specific  
50 component[33]. PCA with oblique rotation was performed to ensure independence of  
51 the items.  
52  
53  
54  
55  
56  
57  
58  
59  
60

1  
2  
3 Reliability testing included assessments of internal consistency and test-retest  
4 reliability. Internal consistency for total and subscale scores was estimated using the  
5 Cronbach's alpha coefficient, and the cut-off scores for acceptable reliability were set  
6 to item-total correlations of  $\geq 0.5$  and in such a way that the Cronbach's alpha would  
7 not be increased by item deletion[34]. A Cronbach's alpha between  $>0.8$  and  $> 0.95$   
8 was taken to indicate that the questionnaire had good or excellent internal  
9 consistency[34]. Test-retest reliability was evaluated through the weighted kappa  
10 coefficient (Kp), Pearson correlation coefficient (r) and a single measure two-way  
11 mixed effects model intra-class correlation (ICC), where an ICC  $>0.80$  was taken to  
12 indicate satisfactory reliability[35]. The paired t-test was used to determine whether  
13 mean scores of the test and retest questionnaires differed significantly. All statistical  
14 significance decisions were based on two-tailed P values of  $<0.05$ . All data analyses  
15 were conducted using the SPSS 17.0 software.  
16  
17  
18  
19  
20  
21  
22  
23  
24  
25  
26  
27  
28  
29

## 30 RESULTS

### 31 Demographic characteristics of the study group

32 Table 1 shows the demographic characteristics of the study group. The sample  
33 consisted of 92.6% female and 7.4% male staff. The mean age was 31.6 years (SD  $\pm$   
34 10.1), with an average length of work experience in healthcare of 8.1 years (SD  $\pm$   
35 7.4). The percentage of ethnic minorities was more than one fourth. Most participants  
36 were registered nurses (62.0%) or enrolled nurses (17.8%). About one third (33.2%)  
37 of the participants had a Bachelor's degree or higher (see Table 1).  
38  
39  
40  
41  
42  
43  
44  
45  
46

### 47 Construct validity

48 The results of the PCA with Bartlett's test ( $p < 0.0001$ ) and the KMO Measure (0.91)  
49 indicated that correlations between items were sufficiently large to perform the PCA.  
50 Only the first three components had eigenvalues greater than one, explaining 73.3%  
51 of the total variance. Therefore, the PCA resulted in a three-component rotated  
52 solution. As shown in Table 2, the first and the second component consisted of five  
53 items (loadings between 0.58 and 0.84 vs. loadings between 0.68 and 0.82), where the  
54  
55  
56  
57  
58  
59  
60

1  
2  
3 first component confirmed the sub-scale 'A climate of safety' and where the second  
4 component confirmed the sub-scale 'A climate of everydayness' in the setting. The  
5 third component comprised four items (loadings between 0.64 and 0.87), and  
6 confirmed the sub-scale 'A climate of community'.  
7  
8  
9

10  
11  
12 The three-component model was also evaluated by confirmative factor analysis, and  
13 goodness of fit was estimated using indices of the Root Mean Square Error of  
14 Approximation (RMSEA), the Normed Fit Index (NFI) and the Comparative Fit Index  
15 (CFI). The results indicated that the goodness of fit of the questionnaire was 0.78 for  
16 the RMSEA, 0.91 for the NFI and 0.92 for the CFI. Thus, the confirmatory factor  
17 analysis supported the exploratory findings, and the three-component model provided  
18 adequate fit indices for the questionnaire.  
19  
20  
21  
22  
23  
24  
25  
26  
27

### 28 **Reliability**

29  
30 Table 2 shows that the Cronbach's alpha coefficient of the 14-item Chinese PCQ-S  
31 was 0.94 for the total scale, 0.87 for the safety subscale, 0.90 for the everydayness  
32 subscale and 0.88 for the community subscale, indicating a strong internal consistency  
33 reliability overall. Furthermore, the corrected item-total correlations for all items  
34 ranged from 0.54 to 0.79, indicating that each item correlated adequately with the  
35 total score and thus that the scale is homogenous without any item being redundant  
36 (Table 3).  
37  
38  
39  
40  
41  
42  
43  
44

45 Table 4 presents the results from the test-retest reliability assessment of the Chinese  
46 PCQ-S. The result of the Kp statistic for the overall scale scores was 0.85 ( $P < 0.001$ ),  
47 indicating that the Chinese PCQ-S instrument has substantial reliability. For each  
48 subscale, the results varied from 0.75 to 0.82 ( $P < 0.001$ ). According to the Pearson's  
49 correlation coefficient analyses, the Chinese PCQ-S indicated high correlation  
50 between test and retest on all scale levels: on the sub-scales 'a climate of safety' ( $r =$   
51  $0.88$ ,  $P < 0.01$ ), 'a climate of everydayness' ( $r = 0.91$ ,  $P < 0.01$ ) and 'a climate of  
52 community' ( $r = 0.79$ ,  $P < 0.01$ ) as well as on the overall scale scores between test and  
53  
54  
55  
56  
57  
58  
59  
60



1  
2  
3 retest ( $r=0.93$ ,  $P<0.01$ ). A paired t-test also confirmed that there was no significant  
4 difference between the mean scores of the PCQ-S at the test and retest ratings  
5 ( $P>0.05$ ). The ICC of the total score between the test and retest times was 0.97,  
6  
7 providing further support that the scale had satisfactory test–retest reliability.  
8  
9

## 10 11 12 **DISCUSSION**

13 This is the first study to validate the PCQ-S in an Asian population, and the results of  
14 the present study indicated that the cross-culturally adapted Chinese version PCQ-S  
15 showed excellent reliability and validity for evaluating staff perceptions of  
16 person-centredness in Chinese hospital contexts, which enables further studies and  
17 international comparisons.  
18  
19

20 In this study, the English PCQ-S was cross-culturally adapted into the Chinese version  
21 and showed satisfactory psychometric properties (construct validity, test-retest  
22 reliability and internal consistency). During our translation of the English PCQ-S into  
23 Chinese, a minor cultural discrepancy was encountered and one item of the PCQ-S  
24 was therefore modified accordingly. In this instance, ‘peaceful’ was replaced by  
25 ‘harmonious’ as this word is closer to Chinese culture. Construct validity was  
26 estimated using PCA with varimax orthogonal rotation, resulting in a stable  
27 three-factor solution explaining 73.3% of the total variance. The ICC for the overall  
28 Chinese PCQ-S scale was 0.97 and for the three subscales was 0.93, 0.95 and 0.92,  
29 demonstrating that the test-retest reliability of the overall scale and different domains  
30 was excellent. Furthermore, strong internal consistency of the Chinese PCQ-S was  
31 demonstrated, as evidenced through a Cronbach’s alpha of 0.89 for the total scale,  
32 0.87 for the safety subscale, 0.90 for the everydayness subscale and 0.88 for the  
33 community subscale.  
34  
35  
36  
37  
38  
39  
40  
41  
42  
43  
44  
45  
46  
47  
48  
49  
50  
51

52 This Chinese version of the PCQ-S showed the same sub-scale structure as the  
53 Swedish, Norwegian and Slovenian versions - a structure with the three subscales  
54 described above (a climate of safety, everydayness and community) consisting of 14  
55  
56  
57  
58  
59  
60



1  
2  
3 items. However, it showed a different structure with the English PCQ-S - a  
4  
5 four-component structure (a climate of safety, everydayness, community and  
6  
7 comprehensibility) consisting of 14 items, which may reflect a difference in cultural  
8  
9 context. Even though the original English PCQ-S described a slightly different  
10  
11 structure consisting of four subscales, the instrument developers have recently  
12  
13 suggested keeping to the three subscale structure for scoring and comparison purposes  
14  
15 as this confirms the theory on which the scale rests [20].  
16

17  
18 In the Chinese PCQ-S, the ICC (0.97) and Cronbach's alpha for the total scale (0.94)  
19  
20 were much higher than in the Swedish (0.51 vs. 0.88) and English (0.75 vs. 0.89)  
21  
22 versions, and the Cronbach's alpha for the total scale was also higher than it was in  
23  
24 the Norwegian version (0.92). Due to the larger the sample size in our study, which  
25  
26 differs from those in the above three studies, the Chinese PCQ-S may have stronger  
27  
28 test-retest reliability and internal consistency compared to other language versions of  
29  
30 the PCQ-S. The results demonstrated that the Chinese PCQ-S has good  
31  
32 reproducibility and well maintains the properties of the original version, and can thus  
33  
34 be used in Chinese hospital environments.  
35

36  
37 The following limitations of the present study should be noted. First, the study  
38  
39 employed a convenience sampling method to select staff in palliative care from public  
40  
41 hospitals, which may limit the ability to generalize the results to staff in general at  
42  
43 Chinese hospitals or other staff working other health care contexts. Second, the  
44  
45 Chinese PCQ-S questionnaire has been tested only in this hospital environment, and  
46  
47 further psychometric testing of the scale in other settings like nursing homes would be  
48  
49 helpful to enable further rigorous comparisons of Chinese PCQ-S in different contexts  
50  
51 and settings. Third, the questionnaire had been translated only from the secondary  
52  
53 English version, not from the original Swedish version. Fourth, with respect to the  
54  
55 psychometric assessment of the PCQ-S, criterion-related validity, convergent validity  
56  
57 and discriminative validity were not taken into account. Further study is needed to  
58  
59 explore this in the future. Fifth, the back-translated version was not validated, due to  
60

1  
2  
3 the cross-cultural adaptation.  
4  
5  
6

### 7 **Conclusion**

8  
9 The 14-item Chinese PCQ-S is a cross-culturally adapted version of the English  
10 PCQ-S, which showed excellent psychometric properties in terms of reliability and  
11 validity for evaluating staff perceptions of the person-centredness in Chinese hospital  
12 environments. Our results indicated that the Chinese version of the PCQ-S can be  
13 utilized for future measurement and development of person-centred care in China and  
14 for conducting cross-cultural international comparisons with for example Sweden.  
15  
16  
17  
18  
19

### 20 **Ethical approval and consent to participate**

21  
22 This study was approved by the Ethics Committee of Kunming Medical University.  
23  
24 Oral and written informed consent was obtained from all persons participating in the  
25 study.  
26  
27  
28  
29

### 30 **Availability of data and material**

31  
32 The datasets used and/or analysed during the current study are available from the  
33 corresponding author on request.  
34  
35  
36  
37  
38

### 39 **Competing interests**

40  
41 The authors declare that there are no conflicts of interest.  
42  
43  
44

### 45 **Consent for publication**

46  
47 Not applicable.  
48  
49

### 50 **Funding**

51  
52 The study was supported by grants from the National Natural Science Fund of China  
53 (Grant number: 81611130077), the Swedish Research Council (Grant number:  
54 2015-06243) and the Major Union Specific Project Foundation of Yunnan Provincial  
55 Science and Technology Department and Kunming Medical University (2016).  
56  
57  
58  
59  
60

### Authors' contributions

CL (Kunming Medical University, China) was responsible for the study design, data analysis, and drafting the paper. GA (Lund University, Sweden), TP (Kunming Medical University, China) and MK (the third people's hospital of Kunming, China) contributed to the study design and provided comments on the paper during the writing process. DE (La Trobe University, Australia) and LB (Lund University, Sweden) provided comments on the paper during the writing process. FH, ZJ and JY (the third people's hospital of Kunming, China) were responsible for the data collection.

### Acknowledgements

We would like to thank Ms Huang Jingjing and Ms Wu Chao, two postgraduates of the School of Public Health, Kunming Medical University, who helped us with data collection and Magnus Persson, Lund University, Sweden for providing comments on the paper.

## REFERENCES

1. Sixth National Population Census of the People's Republic of China. Beijing, China: National Bureau of Statistics of China 2011.
2. World population prospects: the 2012 revision. New York, United States: Department of Economic and Social Affairs (DoEaSA), Population Division, United Nations 2013.
3. Dong H-J, Wressle E, Marcusson J. Multimorbidity patterns of and use of health services by Swedish 85-year-olds: an exploratory study. *BMC Geriatr* 2013;13(1):120-20. doi: 10.1186/1471-2318-13-120
4. Liao C-C, Li C-R, Lee S-H, et al. Social support and mortality among the aged people with major diseases or ADL disabilities in Taiwan: A national study. *Arch Gerontol Geriatr* 2015;60(2):317-21. doi: 10.1016/j.archger.2014.11.007
5. Hsu CY, O'Connor M, Lee S. Understandings of death and dying for people of Chinese origin. *Death Stud* 2009;33(2):153-74. doi: 10.1080/07481180802440431
6. Chan CLW, Chow AYM. Death, dying and bereavement : a Hong Kong Chinese experience. Hong Kong: Hong Kong University Press 2006.
7. McGilton KS, Heath H, Chu CH, et al. Moving the agenda forward: a person-centred framework in long-term care. *Int J Older People Nurs* 2012;7(4):303-9. doi: 10.1111/opn.12010
8. Winefield H. MT, Clifford J., Farmer E. The search for reliable and valid measures of patient-centredness. *Psychol Health* 1996(11):811-24.
9. Edvardsson DW, B. Sandman, P O. Person-centred care of people with severe Alzheimer's disease: current status and ways forward. *Lancet Neurology* 2008(4):362. doi: 10.1016/S1474-4422(08)70063-2
10. McCormack B. Person-centredness in gerontological nursing: an overview of the literature. *J Clin Nurs* 2004;13(3a):31-8. doi: 10.1111/j.1365-2702.2004.00924.x
11. McCance T, Slater P, McCormack B. Using the caring dimensions inventory as an indicator of person-centred nursing. *J Clin Nurs* 2009;18(3):409-17. doi: 10.1111/j.1365-2702.2008.02466.x
12. Buckley C, McCormack B, Ryan A. Valuing narrative in the care of older people: A framework of narrative practice for older adult residential care settings. *J Clin Nurs* 2014;23(17-18):2565-77. doi: 10.1111/jocn.12472
13. Edvardsson D, Fetherstonhaugh D, Nay R. Promoting a continuation of self and normality: person-centred care as described by people with dementia, their family members and aged care staff. *J Clin Nurs* 2010;19(17-18):2611-18. doi: 10.1111/j.1365-2702.2009.03143.x
14. McCormack B, Dewing J, Breslin L, et al. Developing person-centred practice: nursing outcomes arising from changes to the care environment in residential settings for older people. *Int J Older People Nurs* 2010;5(2):93-107. doi: 10.1111/j.1748-3743.2010.00216.x
15. Crandall LG, White DL, Schultheis S, et al. Initiating person-centered care practices in long-term care facilities. *J Gerontol Nurs* 2007;33(11):47-56.
16. McCormack B, McCance TV. Development of a framework for person-centred nursing. *J Adv Nurs* 2006;56(5):472-79. doi: 10.1111/j.1365-2648.2006.04042.x
17. Edvardsson D, Fetherstonhaugh D, McAuliffe L, et al. Job satisfaction amongst aged care staff: exploring the influence of person-centered care provision. *Int Psychogeriatr* 2011;23(8):1205-12. doi: 10.1017/S1041610211000159

18. McKeown J, Clarke A, Ingleton C, et al. The use of life story work with people with dementia to enhance person-centred care. *Int J Older People Nurs* 2010;5(2):148-58. doi: 10.1111/j.1748-3743.2010.00219.x
19. Bone C, Cheung G, Wade B. Evaluating person centred care and Dementia Care Mapping in a psychogeriatric hospital in New Zealand: a pilot study. *NZJOT* 2010;57(1):35-40.
20. Edvardsson D, Sandman PO, Rasmussen B. Construction and psychometric evaluation of the Swedish language Person-centred Climate Questionnaire - staff version. *J Nurs Manag* 2009;17(7):790-5. doi: 10.1111/j.1365-2834.2009.01005.x
21. Edvardsson D, Fetherstonhaugh D, Nay R, et al. Development and initial testing of the Person-centered Care Assessment Tool (P-CAT). *Int Psychogeriatr* 2010;22(1):101-8. doi: 10.1017/S1041610209990688
22. White DL, Newton-Curtis L, Lyons KS. Development and initial testing of a measure of person-directed care. *Gerontologist* 2008;48 Spec No 1:114-23.
23. Chappell N, Reid R, Gish J. Staff-based measures of individualized care for persons with dementia in long-term care facilities. *Dementia* 2007;6(4):527-47. doi: doi:10.1177/1471301207084372
24. Zimmerman S, Allen J, Cohen LW, et al. A measure of person-centered practices in assisted living: the PC-PAL. *J Am Med Dir Assoc* 2015;16(2):132-7. doi: 10.1016/j.jamda.2014.07.016
25. Edvardsson D, Sjogren K, Lindkvist M, et al. Person-centred climate questionnaire (PCQ-S): establishing reliability and cut-off scores in residential aged care. *J Nurs Manag* 2015;23(3):315-23. doi: 10.1111/jonm.12132
26. Bergland A, Kirkevold M, Edvardsson D. Psychometric properties of the Norwegian Person-centred Climate Questionnaire from a nursing home context. *Scand J Caring Sci* 2012;26(4):820-8. doi: 10.1111/j.1471-6712.2012.00979.x
27. Edvardsson D, Koch S, Nay R. Psychometric evaluation of the English language Person-centred Climate Questionnaire--staff version. *J Nurs Manag* 2010;18(1):54-60. doi: 10.1111/j.1365-2834.2009.01038.x
28. Vrbnjak D, Pahor D, Povalej Brzan P, et al. Psychometric testing of the Slovenian Person-centred Climate Questionnaire - staff version. *J Nurs Manag* 2017 doi: 10.1111/jonm.12479
29. Guillemin F. Cross-cultural adaptation and validation of health status measures. *Scand J Rheumatol* 1995;24(2):61-3.
30. Beaton DE, Bombardier C, Guillemin F, et al. Guidelines for the process of cross-cultural adaptation of self-report measures. *Spine (Phila Pa 1976)* 2000;25(24):3186-91.
31. Terwee CB, Bot SD, de Boer MR, et al. Quality criteria were proposed for measurement properties of health status questionnaires. *J Clin Epidemiol* 2007;60(1):34-42. doi: 10.1016/j.jclinepi.2006.03.012
32. Nunnally JC, Bernstein IH. Psychometric theory. New York: McGraw-Hill 1994.
33. Pett MA, Lackey NR, Sullivan JJ. Making sense of factor analysis : the use of factor analysis for instrument development in health care research. London: SAGE 2003.
34. Bland JM, Altman DG. Cronbach's alpha. *BMJ* 1997;314(7080):572.
35. Landis JR, Koch GG. The measurement of observer agreement for categorical data. *Biometrics* 1977;33(1):159-74.

**Table 1 Demographic characteristics of the study sample (n=163)**

| Characteristics    | n (%)      |
|--------------------|------------|
| Gender             |            |
| Female             | 151 (92.6) |
| Male               | 12 (7.4)   |
| Age (years)        |            |
| 18-30              | 95 (58.3)  |
| 31-39              | 33 (20.2)  |
| ≥40                | 35 (21.5)  |
| Level of education |            |
| High school        | 7 (4.3)    |
| Secondary school   | 37 (22.7)  |
| Junior college     | 65 (39.9)  |
| Bachelor or higher | 54 (33.2)  |
| Ethnicity          |            |
| Han                | 118 (72.4) |
| Minorities         | 45 (27.6)  |
| Healthcare staff   |            |
| Registered nurse   | 101 (62.0) |
| Enrolled nurse     | 29 (17.8)  |
| Physician          | 33 (20.2)  |

**Table 2 Rotated component matrix for PCA of the Chinese PCQ-S (n=163)**

| Item number                     | Item content                                                                          | Factor loadings                       |                                             |                                          |
|---------------------------------|---------------------------------------------------------------------------------------|---------------------------------------|---------------------------------------------|------------------------------------------|
|                                 |                                                                                       | Subscale 1:<br>A climate of<br>safety | Subscale 2:<br>A climate of<br>everydayness | Subscale 3:<br>A climate of<br>community |
| 1                               | A place where I feel welcome                                                          | 0.83                                  |                                             |                                          |
| 2                               | A place where I feel acknowledged as<br>a person                                      | 0.84                                  |                                             |                                          |
| 3                               | A place where I feel I can be myself                                                  | 0.58                                  |                                             |                                          |
| 4                               | A place where the patients are in safe<br>hands                                       | 0.66                                  |                                             |                                          |
| 5                               | A place where the staff use a language<br>that the patients can understand            | 0.60                                  |                                             |                                          |
| 6                               | A place which feels homely even<br>though it is in an institution                     |                                       | 0.82                                        |                                          |
| 7                               | A place where there is something nice<br>to look at                                   |                                       | 0.81                                        |                                          |
| 8                               | A place where it is quiet and peaceful                                                |                                       | 0.78                                        |                                          |
| 9                               | A place where it is possible to get<br>unpleasant thoughts out of your head           |                                       | 0.74                                        |                                          |
| 10                              | A place which is neat and clean                                                       |                                       | 0.68                                        |                                          |
| 11                              | A place where it is easy for the patients<br>to keep in contact with their loved ones |                                       |                                             | 0.64                                     |
| 12                              | A place where it is easy for the patients<br>to receive visitors                      |                                       |                                             | 0.87                                     |
| 13                              | A place where it is easy for the patients<br>to talk to the staff                     |                                       |                                             | 0.85                                     |
| 14                              | A place where the patients have<br>someone to talk to if they so wish                 |                                       |                                             | 0.66                                     |
| Total variance<br>explained (%) | 73.3 (total 3 subscales)                                                              | 55.6                                  | 9.5                                         | 8.2                                      |
| Cronbach's alpha                | 0.94 (total 14 items)                                                                 | 0.87                                  | 0.90                                        | 0.88                                     |

**Table 3 Item performance and reliability test of the Chinese PCQ-S  
(n=163)**

| Item number | Item content                                                                       | Mean $\pm$ SD   | Corrected item:<br>total correction | Cronbach's alpha<br>if item deleted |
|-------------|------------------------------------------------------------------------------------|-----------------|-------------------------------------|-------------------------------------|
| 1           | A place where I feel welcome                                                       | 4.04 $\pm$ 0.93 | 0.62                                | 0.93                                |
| 2           | A place where I feel acknowledged as a person                                      | 4.07 $\pm$ 0.92 | 0.54                                | 0.93                                |
| 3           | A place where I feel I can be myself                                               | 3.58 $\pm$ 1.32 | 0.70                                | 0.93                                |
| 4           | A place where the patients are in safe hands                                       | 4.06 $\pm$ 0.96 | 0.72                                | 0.93                                |
| 5           | A place where the staff use a language that the patients can understand            | 3.90 $\pm$ 1.01 | 0.72                                | 0.93                                |
| 6           | A place which feels homely even though it is in an institution                     | 3.80 $\pm$ 1.13 | 0.77                                | 0.93                                |
| 7           | A place where there is something nice to look at                                   | 3.60 $\pm$ 1.15 | 0.76                                | 0.93                                |
| 8           | A place where it is quiet and peaceful                                             | 3.80 $\pm$ 1.04 | 0.78                                | 0.93                                |
| 9           | A place where it is possible to get unpleasant thoughts out of your head           | 3.20 $\pm$ 1.34 | 0.66                                | 0.93                                |
| 10          | A place which is neat and clean                                                    | 3.85 $\pm$ 1.01 | 0.70                                | 0.93                                |
| 11          | A place where it is easy for the patients to keep in contact with their loved ones | 3.88 $\pm$ 1.03 | 0.79                                | 0.93                                |
| 12          | A place where it is easy for the patients to receive visitors                      | 3.40 $\pm$ 1.36 | 0.59                                | 0.93                                |
| 13          | A place where it is easy for the patients to talk to the staff                     | 3.72 $\pm$ 1.16 | 0.71                                | 0.93                                |
| 14          | A place where the patients have someone to talk to if they so wish                 | 3.94 $\pm$ 1.03 | 0.67                                | 0.93                                |



**Table 4 Test-retest reliability of the Chinese PCQ-S (n=163)**

| Scale dimension              | 1st test<br>(Mean ± SD) | 2nd test<br>(Mean ± SD) | P    | Weighted<br>kappa<br>(Kp) | Pearson<br>correlation<br>coefficient ( r) | ICC (95% CI)      |
|------------------------------|-------------------------|-------------------------|------|---------------------------|--------------------------------------------|-------------------|
| A climate of safety          | 19.7 ± 4.2              | 19.8 ± 4.0              | 0.30 | 0.77                      | 0.88                                       | 0.93 (0.91, 0.95) |
| A climate of<br>everydayness | 18.3 ± 4.8              | 18.1 ± 4.9              | 0.38 | 0.82                      | 0.91                                       | 0.95 (0.93, 0.96) |
| A climate of<br>community    | 15.0 ± 4.0              | 14.7 ± 4.1              | 0.18 | 0.75                      | 0.79                                       | 0.92 (0.89, 0.94) |
| Overall scale                | 52.9 ± 11.4             | 52.6 ± 11.7             | 0.40 | 0.85                      | 0.93                                       | 0.97 (0.95-0.98)  |

STROBE Statement—Checklist of items that should be included in reports of *cross-sectional studies*

|                           | Item No. | Recommendation                                                                                                                                                                                                                                                                                                                                                                                                                                                         | Page No. | Relevant text from manuscript               |
|---------------------------|----------|------------------------------------------------------------------------------------------------------------------------------------------------------------------------------------------------------------------------------------------------------------------------------------------------------------------------------------------------------------------------------------------------------------------------------------------------------------------------|----------|---------------------------------------------|
| <b>Title and abstract</b> | 1        | (a) Indicate the study’s design with a commonly used term in the title or the abstract                                                                                                                                                                                                                                                                                                                                                                                 | 0        | Cross-sectional design                      |
|                           |          | (b) Provide in the abstract an informative and balanced summary of what was done and what was found                                                                                                                                                                                                                                                                                                                                                                    | 1-2      | Results, Conclusions                        |
| <b>Introduction</b>       |          |                                                                                                                                                                                                                                                                                                                                                                                                                                                                        |          |                                             |
| Background/rationale      | 2        | Explain the scientific background and rationale for the investigation being reported                                                                                                                                                                                                                                                                                                                                                                                   | 3-5      | Introduction                                |
| Objectives                | 3        | State specific objectives, including any prespecified hypotheses                                                                                                                                                                                                                                                                                                                                                                                                       | 5        | The purpose of this study                   |
| <b>Methods</b>            |          |                                                                                                                                                                                                                                                                                                                                                                                                                                                                        |          |                                             |
| Study design              | 4        | Present key elements of study design early in the paper                                                                                                                                                                                                                                                                                                                                                                                                                | 5        | Methods                                     |
| Setting                   | 5        | Describe the setting, locations, and relevant dates, including periods of recruitment, exposure, follow-up, and data collection                                                                                                                                                                                                                                                                                                                                        | -        | Sample and Participants, Data collection    |
| Participants              | 6        | (a) <i>Cohort study</i> —Give the eligibility criteria, and the sources and methods of selection of participants. Describe methods of follow-up<br><i>Case-control study</i> —Give the eligibility criteria, and the sources and methods of case ascertainment and control selection. Give the rationale for the choice of cases and controls<br><i>Cross-sectional study</i> —Give the eligibility criteria, and the sources and methods of selection of participants | 6-7      | Sample and Participants, inclusion criteria |
|                           |          | (b) <i>Cohort study</i> —For matched studies, give matching criteria and number of exposed and unexposed<br><i>Case-control study</i> —For matched studies, give matching criteria and the number of controls per case                                                                                                                                                                                                                                                 |          |                                             |
| Variables                 | 7        | Clearly define all outcomes, exposures, predictors, potential confounders, and effect modifiers. Give diagnostic criteria, if applicable                                                                                                                                                                                                                                                                                                                               | 5-8      | Results                                     |
| Data sources/ measurement | 8*       | For each variable of interest, give sources of data and details of methods of assessment (measurement). Describe comparability of assessment methods if there is more than one group                                                                                                                                                                                                                                                                                   | 5-6      | Psychometric evaluation                     |
| Bias                      | 9        | Describe any efforts to address potential sources of bias                                                                                                                                                                                                                                                                                                                                                                                                              | 11       | limitation                                  |
| Study size                | 10       | Explain how the study size was arrived at                                                                                                                                                                                                                                                                                                                                                                                                                              | 6        | Sample size                                 |

Continued on next page

|                        |     |                                                                                                                                                                                                                                                                                                           |     |                                                           |   |
|------------------------|-----|-----------------------------------------------------------------------------------------------------------------------------------------------------------------------------------------------------------------------------------------------------------------------------------------------------------|-----|-----------------------------------------------------------|---|
| Quantitative variables | 11  | Explain how quantitative variables were handled in the analyses. If applicable, describe which groupings were chosen and why                                                                                                                                                                              | 7-8 | Psychometric evaluation                                   |   |
| Statistical methods    | 12  | (a) Describe all statistical methods, including those used to control for confounding                                                                                                                                                                                                                     | 7-8 | Psychometric evaluation                                   |   |
|                        |     | (b) Describe any methods used to examine subgroups and interactions                                                                                                                                                                                                                                       |     |                                                           |   |
|                        |     | (c) Explain how missing data were addressed                                                                                                                                                                                                                                                               |     |                                                           |   |
|                        |     | (d) <i>Cohort study</i> —If applicable, explain how loss to follow-up was addressed<br><i>Case-control study</i> —If applicable, explain how matching of cases and controls was addressed<br><i>Cross-sectional study</i> —If applicable, describe analytical methods taking account of sampling strategy |     |                                                           |   |
|                        |     | (e) Describe any sensitivity analyses                                                                                                                                                                                                                                                                     |     |                                                           |   |
| <b>Results</b>         |     |                                                                                                                                                                                                                                                                                                           |     |                                                           |   |
| Participants           | 13* | (a) Report numbers of individuals at each stage of study—eg numbers potentially eligible, examined for eligibility, confirmed eligible, included in the study, completing follow-up, and analysed                                                                                                         | 6   | All staff (n=182) on duty<br>163 consented to participate |   |
|                        |     | (b) Give reasons for non-participation at each stage                                                                                                                                                                                                                                                      |     |                                                           |   |
|                        |     | (c) Consider use of a flow diagram                                                                                                                                                                                                                                                                        |     |                                                           |   |
| Descriptive data       | 14* | (a) Give characteristics of study participants (eg demographic, clinical, social) and information on exposures and potential confounders                                                                                                                                                                  | 8   | Demographic characteristics of the study group            |   |
|                        |     | (b) Indicate number of participants with missing data for each variable of interest                                                                                                                                                                                                                       |     |                                                           |   |
|                        |     | (c) <i>Cohort study</i> —Summarise follow-up time (eg, average and total amount)                                                                                                                                                                                                                          |     |                                                           |   |
| Outcome data           | 15* | <i>Cohort study</i> —Report numbers of outcome events or summary measures over time                                                                                                                                                                                                                       | 8-9 | Results                                                   |   |
|                        |     | <i>Case-control study</i> —Report numbers in each exposure category, or summary measures of exposure                                                                                                                                                                                                      |     |                                                           |   |
|                        |     | <i>Cross-sectional study</i> —Report numbers of outcome events or summary measures                                                                                                                                                                                                                        |     |                                                           |   |
| Main results           | 16  | (a) Give unadjusted estimates and, if applicable, confounder-adjusted estimates and their precision (eg, 95% confidence interval). Make clear which confounders were adjusted for and why they were included                                                                                              | 8-9 |                                                           |   |
|                        |     | (b) Report category boundaries when continuous variables were categorized                                                                                                                                                                                                                                 |     |                                                           | - |
|                        |     | (c) If relevant, consider translating estimates of relative risk into absolute risk for a meaningful time period                                                                                                                                                                                          |     |                                                           | - |

Continued on next page

1  
2  
3  
4  
5  
6  
7  
8  
9  
10  
11  
12  
13  
14  
15  
16  
17  
18  
19  
20  
21  
22  
23  
24  
25  
26  
27  
28  
29  
30  
31  
32  
33  
34  
35  
36  
37  
38  
39  
40  
41  
42  
43  
44  
45  
46  
47  
48  
49

|                          |    |                                                                                                                                                                            |       |                                                                                                                                                                                                                                          |
|--------------------------|----|----------------------------------------------------------------------------------------------------------------------------------------------------------------------------|-------|------------------------------------------------------------------------------------------------------------------------------------------------------------------------------------------------------------------------------------------|
| Other analyses           | 17 | Report other analyses done—eg analyses of subgroups and interactions, and sensitivity analyses                                                                             | -     |                                                                                                                                                                                                                                          |
| <b>Discussion</b>        |    |                                                                                                                                                                            |       |                                                                                                                                                                                                                                          |
| Key results              | 18 | Summarise key results with reference to study objectives                                                                                                                   | 10    | Discussion                                                                                                                                                                                                                               |
| Limitations              | 19 | Discuss limitations of the study, taking into account sources of potential bias or imprecision. Discuss both direction and magnitude of any potential bias                 | 11    | The following limitations of the present study should be noted                                                                                                                                                                           |
| Interpretation           | 20 | Give a cautious overall interpretation of results considering objectives, limitations, multiplicity of analyses, results from similar studies, and other relevant evidence | 10-11 |                                                                                                                                                                                                                                          |
| Generalisability         | 21 | Discuss the generalisability (external validity) of the study results                                                                                                      | 11    | First, the study employed a convenience sampling method to select staff in palliative care from public hospitals, which may limit the ability to generalize the results to a larger population of staff in Chinese hospitals and beyond. |
| <b>Other information</b> |    |                                                                                                                                                                            |       |                                                                                                                                                                                                                                          |
| Funding                  | 22 | Give the source of funding and the role of the funders for the present study and, if applicable, for the original study on which the present article is based              | 12    | Funding                                                                                                                                                                                                                                  |

\*Give information separately for cases and controls in case-control studies and, if applicable, for exposed and unexposed groups in cohort and cross-sectional studies.

**Note:** An Explanation and Elaboration article discusses each checklist item and gives methodological background and published examples of transparent reporting. The STROBE checklist is best used in conjunction with this article (freely available on the Web sites of PLoS Medicine at <http://www.plosmedicine.org/>, Annals of Internal Medicine at <http://www.annals.org/>, and Epidemiology at <http://www.epidem.com/>). Information on the STROBE Initiative is available at [www.strobe-statement.org](http://www.strobe-statement.org).
